# Supplementary material for: Metal free visible light driven oxidation of alcohols to carbonyl derivatives using 3,6-di(pyridin-2-yl)-1,2,4,5-tetrazine (pytz) as catalyst
Source: Royal Society of Chemistry journal article supplement (doi:10.1039/c5ra18151h), 2015-01-01

## **Electronic Supplementary Information**

### **Metal Free Visible Light Driven Oxidation of Alcohols to Carbonyls Using 3, 6-Di(pyridin-2-yl)-1,2,4,5-tetrazine (pytz) as Catalyst**

Suvendu Samanta, Papu Biswas\*

Department of Chemistry, Indian Institute of Engineering Science and Technology, Shibpur,  
Howrah 711 103, West Bengal, India

#### **Table of Contents**

|                                                                  |      |
|------------------------------------------------------------------|------|
| 1. General Information                                           | 2    |
| 2. General procedure for primary and secondary alcohol oxidation | 2    |
| 3. Analytical Data for aldehydes and ketones                     | 3-5  |
| 4. References                                                    | 5    |
| 5. <sup>1</sup> H NMR Spectra                                    | 7-25 |

## 1. General Information

All solvents and commercially available reagents were purchased from commercial sources and used directly. Thin layer chromatography (TLC) was performed on EMD precoated plates (silica gel 60 F254, Art 5715) and visualized by fluorescence quenching under UV light. Column chromatography was performed on Silica Gel (60– 120 Mesh). The synthesis of 3,6-di(pyridin-2-yl)-1,2,4,5-*s*-tetrazine (**pytz**) and 3,6-diphenyl-1,2,4,5-tetrazine (**phtz**) were carried out following the method reported earlier.<sup>1</sup> A Xenon lamp with a power of 300 W equipped with a cut-off filter ( $\lambda > 420$  nm) was used as a visible light source. The reaction was carried out in a 100 mL double walled quartz beaker flask having water inlet and outlet to maintain the room temperature of the reaction vessel. <sup>1</sup>H NMR spectra were recorded using 300, 400MHz NMR spectrometers. All <sup>1</sup>H data were reported in parts per million (ppm) relative to tetramethylsilane ( $\delta_{\text{H}} = 0$ ) in the deuterated solvents. All GC analyses were performed on a GC system with an FID detector using a J & W HP-5 column (30 m, 0.32 mm internal diameter) and *n*-decane as the internal standard. Melting points were determined in open capillaries and are uncorrected.

## 2. Experimental

### General Procedure for the Alcohol Oxidation

**Method A:** Alcohol (2 mmol) was taken in a 100 mL double-walled quartz beaker having water inlet and outlet to maintain the temperature of the reaction vessel in acetonitrile (5 mL). 3,6-di(pyridin-2-yl)-1,2,4,5-*s*-tetrazine (**pytz**, 23.6 mg, 5 mol%) is added to the reaction mixture and the beaker was exposed to visible light under stirring condition and was allowed to proceed for 10–12 h at room temperature. The progress of the reaction was monitored by TLC or gas chromatography. When the reaction reached completion, or no further conversion was observed by gas chromatography, solvent was evaporated at reduced pressure and the product was dissolved in minimum volume of hexane. The reaction mixture was eluted through a plug of silica using hexane affording the corresponding product. Reported yields are the average of at least three runs.

**Method B:** Alcohol (2 mmol), *tert*-butyl nitrite (2.2 mmol, 230 mg), acetic acid (2.2 mmol, 130 mg), and 3,6-di(pyridin-2-yl)-1,2,4,5-*s*-tetrazine (**pytz**, 23.6 mg, 5 mol%) were taken in a 100 mL double-walled quartz beaker having water inlet and outlet to maintain the temperature of the

reaction vessel in acetonitrile (5 mL). The reaction mixture was exposed to visible light under stirring condition and the reaction was allowed to proceed for 4–5 h at room temperature. The progress of the reaction was monitored by TLC or gas chromatography. When the reaction reached completion, or no further conversion was observed by gas chromatography, solvent was evaporated at reduced pressure and the product was dissolved in minimum volume of hexane. The solution was washed with water ( $2 \times 5$  mL) and the hexane layer was dried over anhydrous  $\text{Na}_2\text{SO}_4$ . The reaction mixture was then eluted through a plug of silica using hexane affording the corresponding product. Reported yields are the average of at least three runs.

**Gram-scale Oxidation of Alcohol:** Benzyl alcohol (20 mmol, 2.16 g), *tert*-butyl nitrite (21 mmol, 2.17 g) and acetic acid (21 mmol, 1.26 g) were taken in a 100 mL double-walled quartz beaker having water inlet and outlet to maintain the temperature of the reaction vessel in acetonitrile (50 mL). 3,6-di(pyridin-2-yl)-1,2,4,5-*s*-tetrazine (pytz, 0.47 g, 5 mol%) is added to the reaction mixture and the beaker was exposed to visible light under stirring condition and was allowed to proceed for 7 h at room temperature. The progress of the reaction was monitored by TLC or gas chromatography. When the reaction reached completion, or no further conversion was observed by gas chromatography, solvent was evaporated at reduced pressure and the product was dissolved in minimum volume of hexane. The reaction mixture was eluted through a plug of silica using hexane affording the benzaldehyde; yield: 2.06 g (97%).

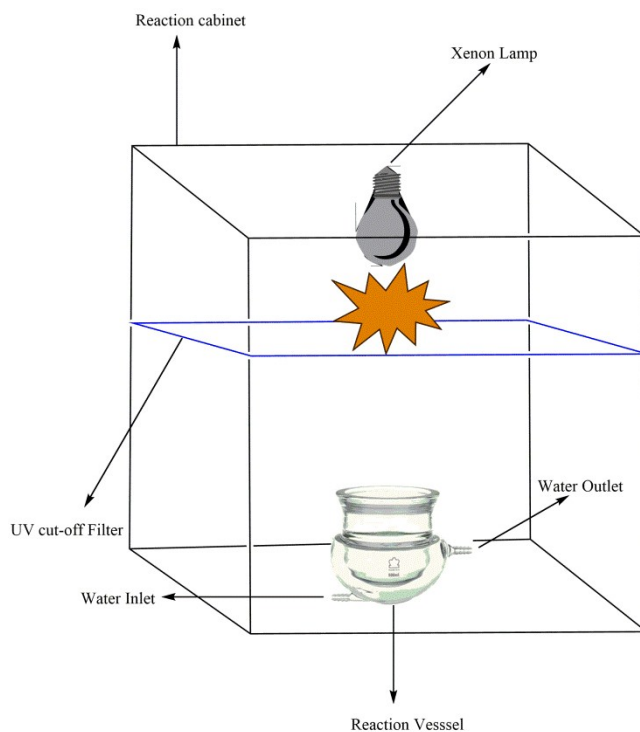

**Scheme S1** Schematic Diagram of Reaction Set-UP

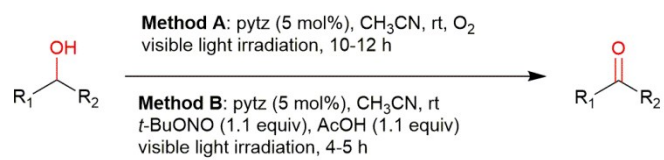

**Scheme S2** Oxidation of Alcohols to Carbonyls

### 3. Analytical Data for Aldehydes and Ketones

**Benzaldehyde (Scheme 4, Entry 2a)**<sup>2</sup>: colorless liquid (method A: 90 mg, 85%; method B: 97 mg, 92%). <sup>1</sup>HNMR (400 MHz, CDCl<sub>3</sub>) δ<sub>H</sub> 9.987 (s, 1H), 8.109 (d, 1H, *J*=7.6 Hz), 7.858 (d, 1H, *J*=7.2 Hz), 7.588 (dd, 2H, *J*=7.2 & 8.4 Hz), 7.496-7.424 (m, 2H).

**3-Nitrobenzaldehyde(Scheme 4, Entry 2b)**<sup>3</sup>: off White solid (method A: 116 mg, 77% ; method B: 126 mg, 84%), mp 107 °C. <sup>1</sup>HNMR (400 MHz, CDCl<sub>3</sub>) δ<sub>H</sub> 10.157 (s, 1H), 8.724-8.272 (m, 2H), 7.725 (t, 1H, *J*=7.6, 8.0 Hz).

**4-Hydroxybenzaldehyde(Scheme 4, Entry 2c)**<sup>4</sup>: Off white solid (method A: 89 mg, 73% ; method B: 97 mg, 80%), mp 115 °C. <sup>1</sup>HNMR (400 MHz, CDCl<sub>3</sub>) δ<sub>H</sub> 9.837 (s, 1H), 7.827 (d, 3H, *J*=6.4 Hz), 7.015 (d, 2H, *J*=4.4 Hz).

**4-(Dimethylamino)benzaldehyde(Scheme 4, Entry 2d)**<sup>5</sup>: White solid (method A: 111 mg, 75% ; method B: 128 mg, 86%),mp 74 °C. <sup>1</sup>HNMR (400 MHz,CDCl<sub>3</sub>) δ<sub>H</sub> 9.715 (s, 1H), 7.712(s, 2H, *J*=8.4 Hz), 6.671 (d, 2H), 3.052 (s, 6H).

**4-Bromobenzaldehyde (Scheme 4, Entry 2e)**<sup>2</sup>: Off white solid (method A: 131 mg, 72% ; method B: 144 mg, 79%), mp55 °C. <sup>1</sup>HNMR (500 MHz, CDCl<sub>3</sub>) δ<sub>H</sub> 9.953 (s, 1H), 7.937-7.507 (m, 4H).

**Anthracene-9-carbaldehyde (Scheme 4, Entry 2f)**<sup>6</sup>: Off White solid (method A: 162 mg, 79% ; method B: 181 mg, 88%), mp 107 °C. <sup>1</sup>HNMR (400 MHz, CDCl<sub>3</sub>) δ<sub>H</sub> 11.411 (s, 1H), 8.9 (d, 2H, *J*=8.4 Hz), 8.528 (s, 1H), 7.95 (d, 2H, *J*=8.4 Hz), 7.640-7.474 (m, 4H).

**Nicotinaldehyde(Scheme 4, Entry 2g)**<sup>7</sup>: color less liquid (method A: 72 mg, 68% ; method B: 81 mg, 76%). <sup>1</sup>HNMR (400 MHz, CDCl<sub>3</sub>) δ<sub>H</sub> 9.882 (s, 1H), 8.829 (s, 1H), 8.583 (s, 1H), 7.931 (d, 1H, *J*=7.2 Hz), 7.265 (s, 1H).

**Thiophene-2-carbaldehyde (Scheme 4, Entry 2h)**<sup>8</sup>:colorless liquid (method A: 79 mg, 71% ; method B: 90 mg, 81%). <sup>1</sup>H NMR (400 MHz, CDCl<sub>3</sub>) δ<sub>H</sub> 9.927 (s, 1H), 7.786 (dd, 2H, *J*=2.4, 7.6, 4.4 Hz), 7.185 (d, 1H, *J*=3.6 Hz).

**(Z)-3,7-Dimethylocta-2,6-dienal(Scheme 4, Entry 2i)**<sup>9</sup>: colorless liquid (method A: 98 mg, 65% ; method B: 109 mg, 72%), <sup>1</sup>H NMR (400 MHz, CDCl<sub>3</sub>) δ<sub>H</sub> 9.934 (dd, 1H, *J*=7.6, 7.2

Hz), 5.874 (d, 1H,  $J = 7.2$  Hz), 5.087 (t, 1H,  $J = 6.8, 5.2$  Hz), 2.594 (t, 1H,  $J = 6.8, 7.2$  Hz), 2.227 (s, 2H), 2.175 (s, 2H), 1.986 (s, 2H), 1.677 (s, 3H), 1.600 (d, 3H,  $J = 6.8$  Hz).

**4-Hydroxy-3-methoxybenzaldehyde (Scheme 4, Entry 2j)**<sup>10</sup>: white solid (method A: 120 mg, 79% ; method B: 130 mg, 86%), <sup>1</sup>H NMR (300MHz, CDCl<sub>3</sub>)  $\delta_{\text{H}}$  9.706 (s, 1H), 7.338-7.310 (m, 2H), 6.94 (dd, 1H,  $J = 3.3, 1.8$  Hz).

**Acetophenone (Scheme 5, Entry 4a)**<sup>2</sup>: colorless oil (method A: 105 mg, 88%; method B: 108 mg, 90%). <sup>1</sup>H NMR (400 MHz, CDCl<sub>3</sub>)  $\delta_{\text{H}}$  7.932 (d, 2H,  $J = 7.6$  Hz), 7.547-7.408 (m, 3H), 2.563 (s, 3H).

**1-(3-Bromophenyl)ethanone (Scheme 5, Entry 4b)**<sup>11</sup>: white solid (method A: 149 mg, 76% ; method B: 157 mg, 80%). <sup>1</sup>H NMR (400MHz, CDCl<sub>3</sub>)  $\delta_{\text{H}}$  8.033 (s, 1H), 7.840 (d, 1H,  $J = 7.6$  Hz), 7.638 (d, 1H,  $J = 7.6$  Hz), 7.316 (t, 1H,  $J = 7.6, 8$  Hz), 2.569 (s, 3H).

**1-p-Tolyloethanone (Scheme 5, Entry 4c)**<sup>12</sup>: White solid (method A: 108 mg, 81% ; method B: 115 mg, 86%). <sup>1</sup>H NMR (400 MHz, CDCl<sub>3</sub>)  $\delta_{\text{H}}$  7.787 (s, 2H), 7.164 (s, 2H), 2.472 (s, 3H), 2.166 (s, 2H).

**1-(3-Nitrophenyl)ethanone (Scheme 5, Entry 4d)**: Brown solid (method A: 132 mg, 80% ; method B: 143 mg, 87%), mp 77°C. <sup>1</sup>H NMR (400 MHz, CDCl<sub>3</sub>)  $\delta_{\text{H}}$  8.718 (s, 1H), 8.382 (d, 1H,  $J = 7.6$  Hz), 8.265 (d, 1H,  $J = 7.6$  Hz), 7.675 (t, 1H,  $J = 7.6$  Hz).

**Benzophenone (Scheme 5, Entry 4e)**<sup>13</sup>: white solid (method A: 134 mg, 74% ; method B: 149 mg, 82%), mp 47-49 °C. <sup>1</sup>H NMR (300MHz, CDCl<sub>3</sub>)  $\delta_{\text{H}}$  7.736 (d, 4H,  $J = 8.1$  Hz), 7.543-7.491 (m, 2H), 7.434-7.382 (m, 4H).

**1-(Anthracen-9-yl)ethanone (Scheme 5, Entry 4f)**<sup>14</sup>: Yellow solid (method A: 160 mg, 73% ; method B: 176 mg, 80%). mp 76 °C. <sup>1</sup>H NMR (400 MHz, CDCl<sub>3</sub>)  $\delta_{\text{H}}$  8.427 (s, 1H), 7.981 (d, 2H,  $J = 8$  Hz), 7.823 (d, 2H,  $J = 8.4$  Hz), 7.504-7.432 (m, 4H), 2.785 (s, 3H).

**10,10a-Dihydroanthracen-9(8aH)-one (Scheme 5, Entry 4g)**: Yellow solid (method A: 156 mg, 80% ; method B: 170 mg, 87%). <sup>1</sup>H NMR (400MHz, CDCl<sub>3</sub>)  $\delta_{\text{H}}$  8.308 (d, 2H,  $J = 7.6$  Hz), 7.543 (t, 2H,  $J = 7.6, 7.2$  Hz), 7.415 (t, 4H,  $J = 7.6$  Hz), 3.845 (s, 3H).

***1-(Thiophen-3-yl)ethanone***(Scheme 5, Entry 4h):colorless liquid (method A: 82 mg, 65% ; method B: 89 mg, 71%),mp58-62 °C.<sup>1</sup>HNMR (400 MHz, CDCl<sub>3</sub>) δ<sub>H</sub> 8.043 (s, 1H), 7.526 (d, 1H, *J* = 4.8 Hz), 7.302 (dd, 1H, *J* = 2.4, 2.8 Hz).

***Cyclohexanone***(Scheme 5, Entry 4i)<sup>13</sup>: Colorless liquid (method A: 70 mg, 72% ; method B: 77 mg, 79%). <sup>1</sup>H NMR (400 MHz, CDCl<sub>3</sub>) 2.337 (t, 3H, *J* = 6.4 Hz), 1.868-1.282 (m, 7H).

#### 4. Reference

- (1) (a) G.Clavier and P. Audebert, *Chem. Rev.*,2010, **110**, 3299.(b) P.Audebert, S.Sadki, F.Miomandre, G.Clavier, M. C. Vernières, M.Saoud and P. Hapiot, *New J. Chem.*,2004, **28**, 387. (c) N. O. Abdel-Rahman, M. A.Kira and M. N. Tolba, *Tetrahedron Lett.*,1968, **9**, 3871.
- (2) B.Guan, D.Xing, G.Cai, X.Wan, N.Yu, Z.Fang, L.Yang and Z. Shi, *J. Am. Chem. Soc.*,2005, **127**, 18004.
- (3) J. D.More and N. S. Finney, *Org. Lett.*,2002, **4**, 3001.
- (4) H.Tsunoyama, H.Sakurai, Y.Negishi and T. J. Tsukuda, *Am.Chem. Soc.*,2005, **127**, 9374.
- (5) M.Rueping, C.Vila, A.Szadkowska, R. M.Koenigs and J. Fronert, *ACS Catal.*,2012, **2**, 2810.
- (6) I. Mallard, D.Landy, N.Bouchemal and S. Fourmentin, *Carbohydrate Research*,2011, **346**, 35.
- (7) J. E. Steves and S. S.Stahl, *J. Am. Chem. Soc.*,2013, **135**, 15742.
- (8) M. Uyanik and K. Ishihara, *Chem. Commun.*,2009, 2086.
- (9) L.De Luca, G.Giacomelli and A. Porcheddu, *J. Org. Chem.*,2001, **66**, 7907.
- (10) K. Walsh, H. F. Sneddon and C. J. Moody, *Org. Lett.*, 2014, **16**, 5224.
- (11) M.V. Adhikari and S. D. Samant, *Ultrasonics Sonochemistry*,2002, **9**, 107.
- (12) T. Jaimol, A.K. Pandey and A.P. Singh, *Journal of Molecular Catalysis A: Chemical*,2001, **170**, 117.
- (13) K. Alagiri and K. R. Prabhu, *Tetrahedron*,2011, **67**, 8544.
- (14) E. C. Hawkins, *J. Chem. Soc.*,1957, 3858.



## 5.1H NMR Spectra

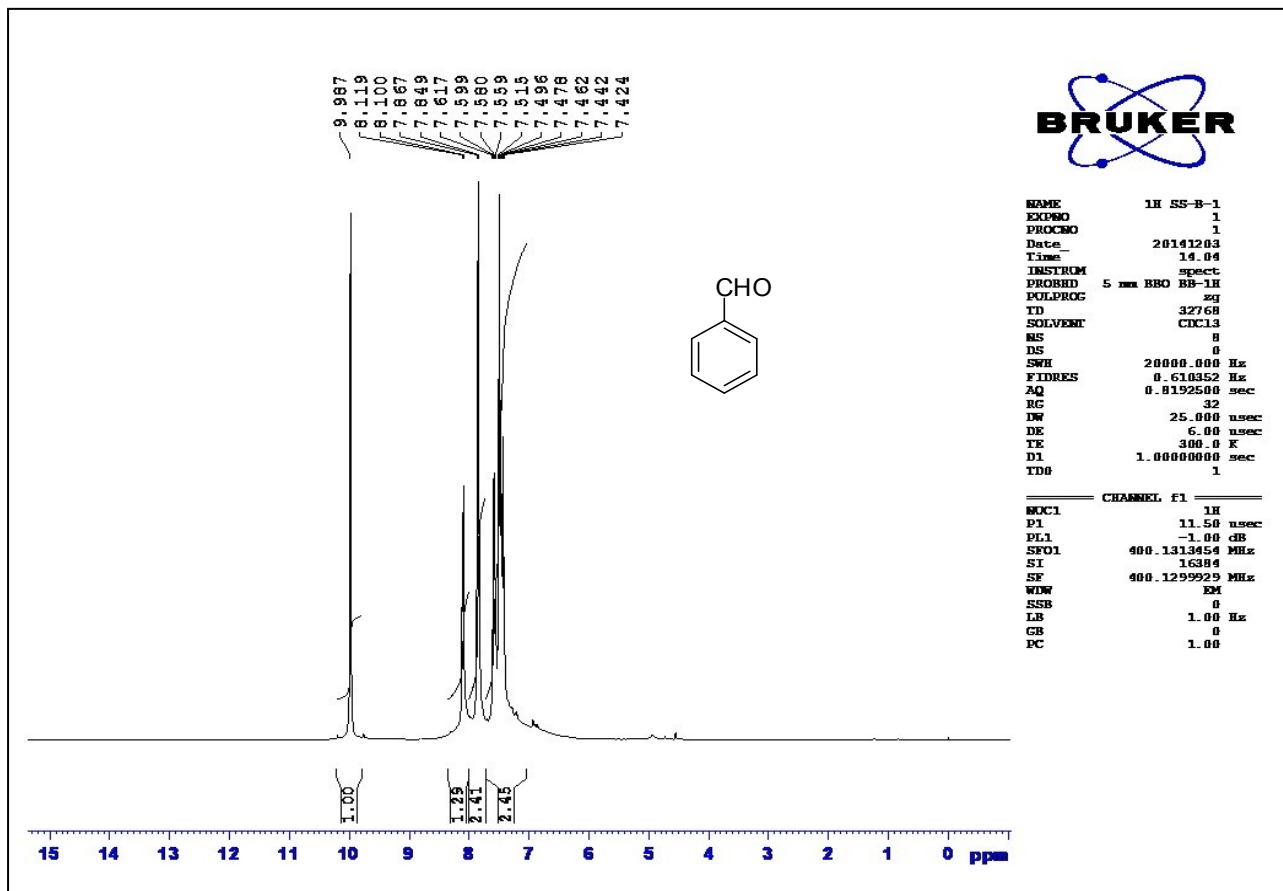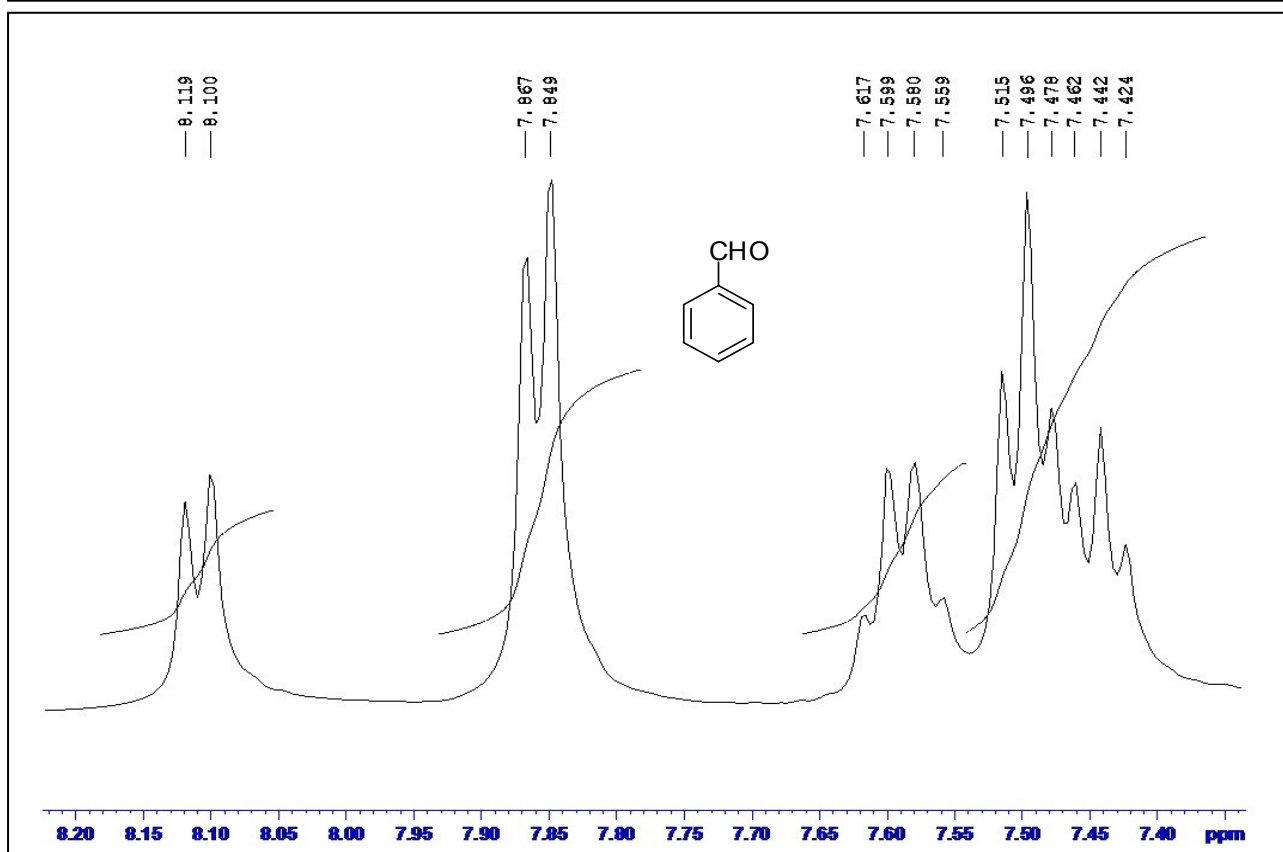

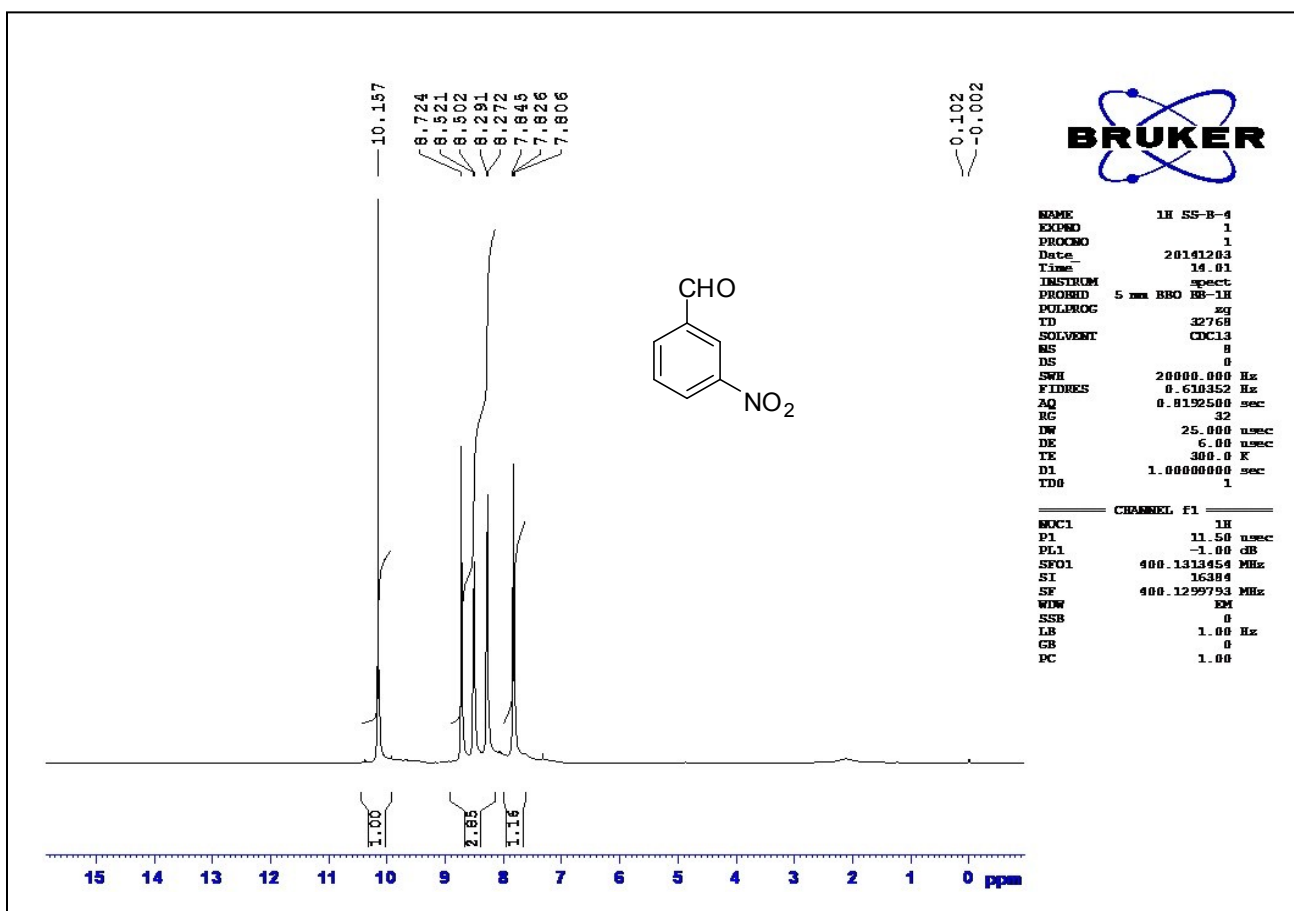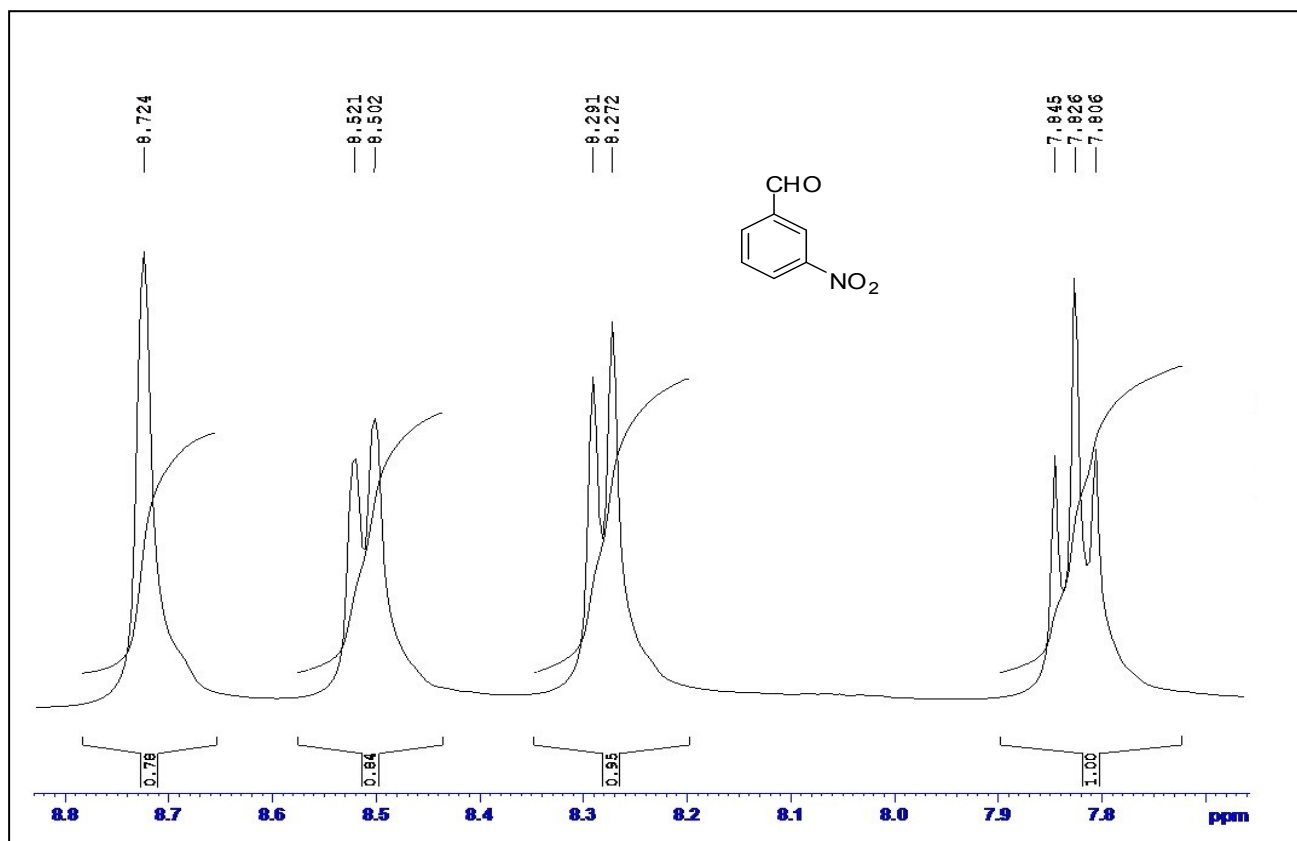

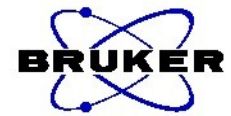

NAME 1H SS-B-5  
EXPRO 1  
PROCNO 1  
Date 20141203  
Time 12.47  
INSTRUM spect  
PROBHD 5 mm BBO BB-1H  
PULPROG zg  
TD 32768  
SOLVENT CDC13  
NS 8  
DS 8  
SWH 20000.000 Hz  
FIDRES 0.618352 Hz  
AQ 0.8192500 sec  
RG 128  
RC 128  
DW 25.000 usec  
DE 6.00 usec  
TE 300.0 K  
D1 1.0000000 sec  
TD0 1

CHANNEL f1  
NUC1 1H  
P1 11.50 usec  
PL1 -1.00 dB  
SFO1 400.131605 MHz  
SI 16384  
SF 400.130013 MHz  
WDW EM  
SSB 0  
LB 1.00 Hz  
GB 0  
PC 1.00

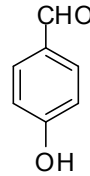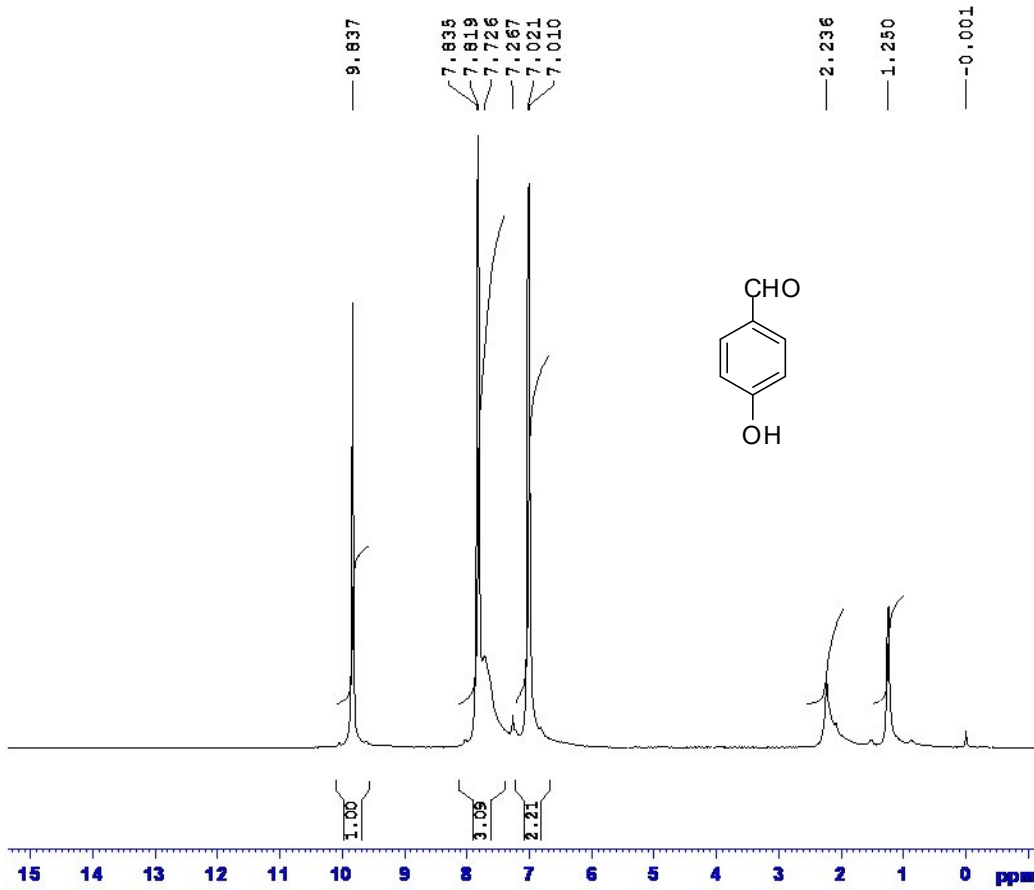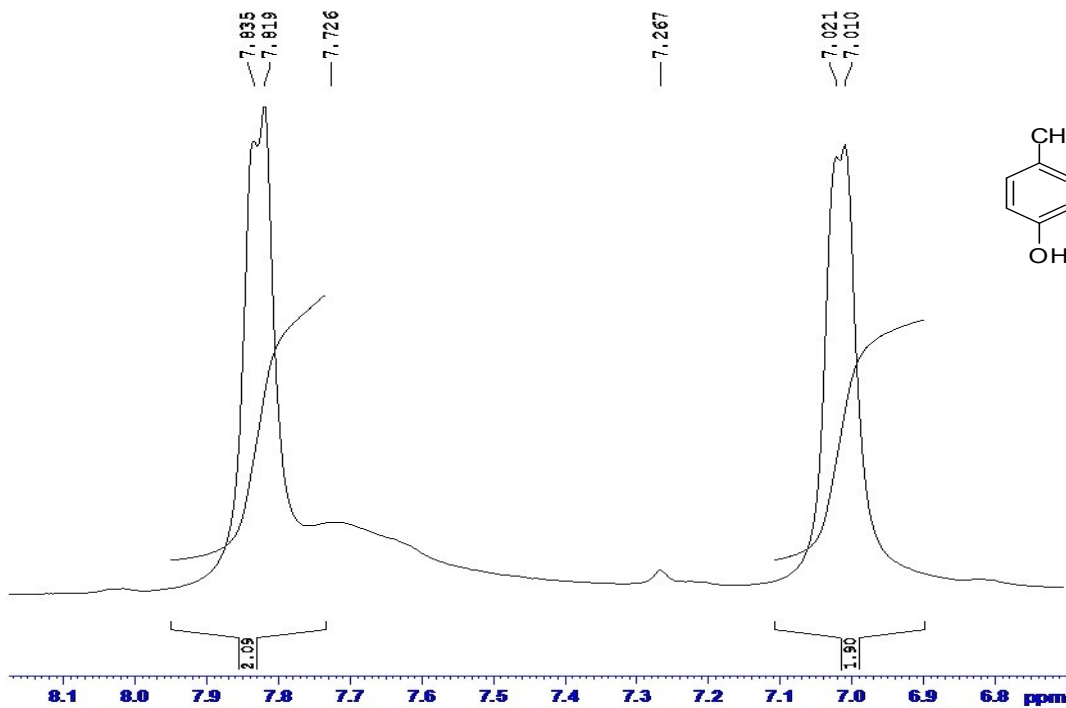

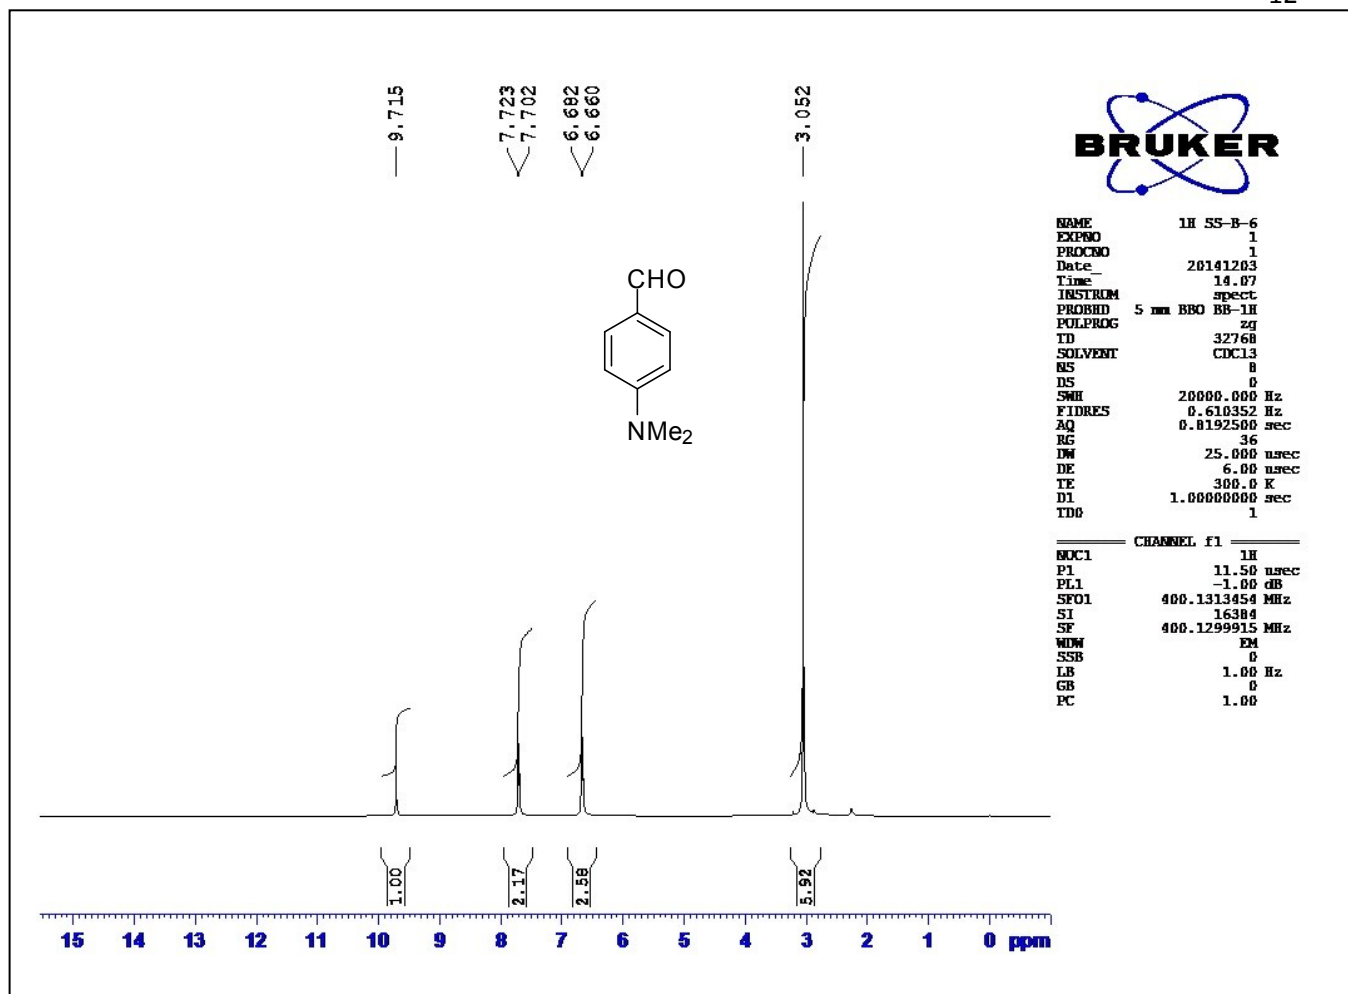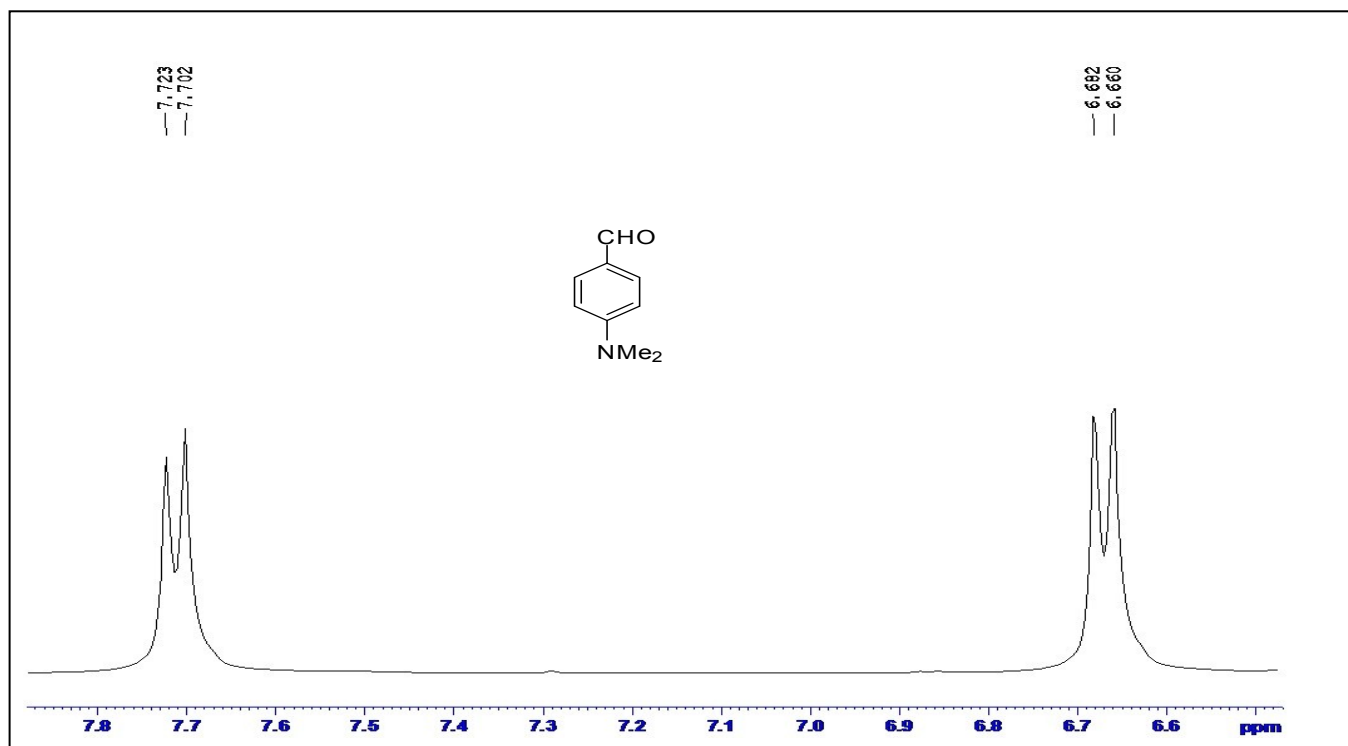

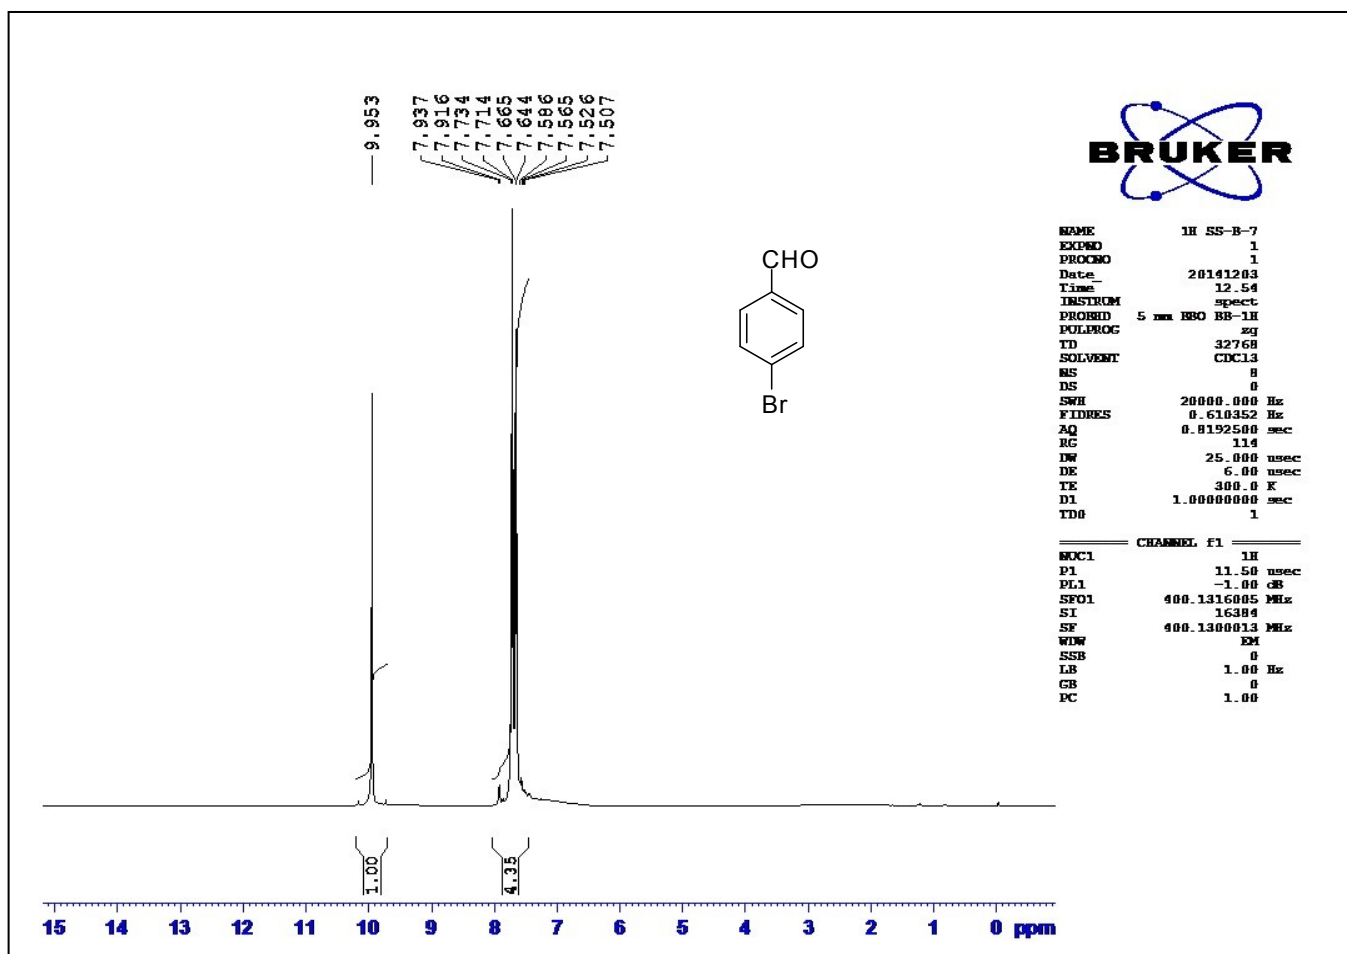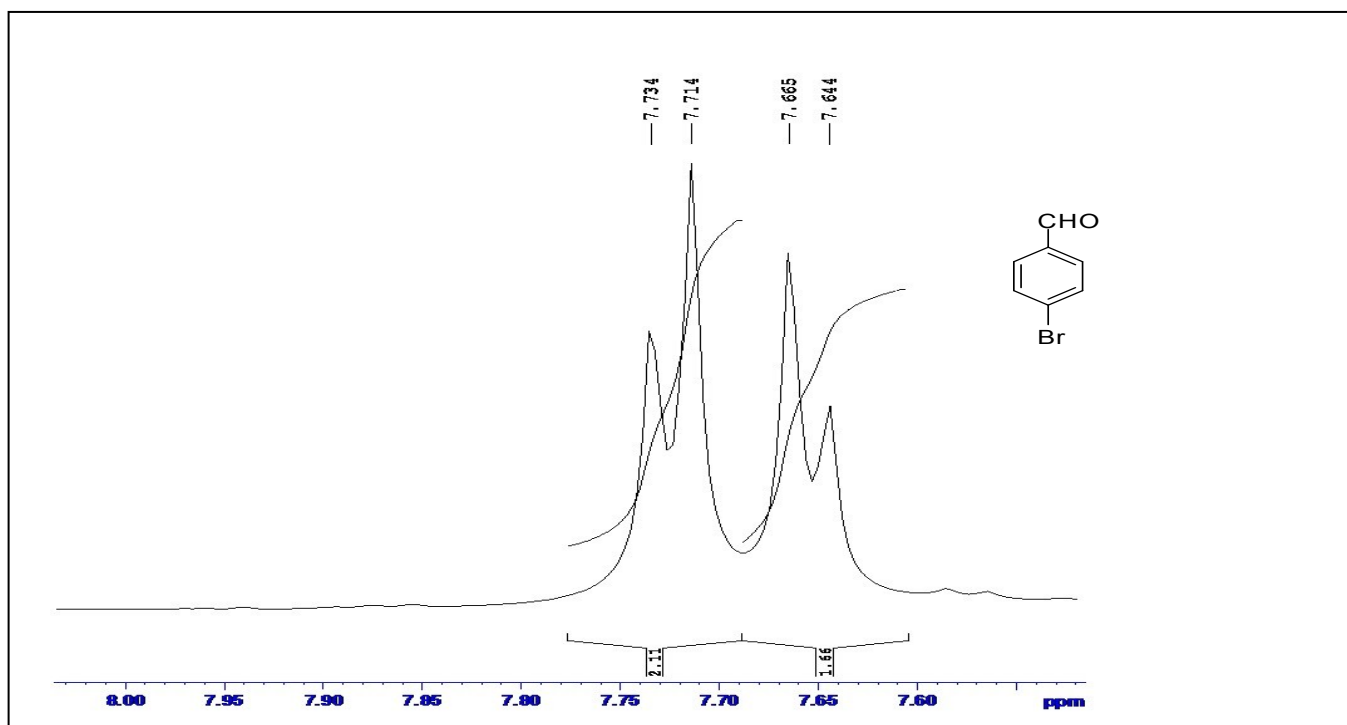

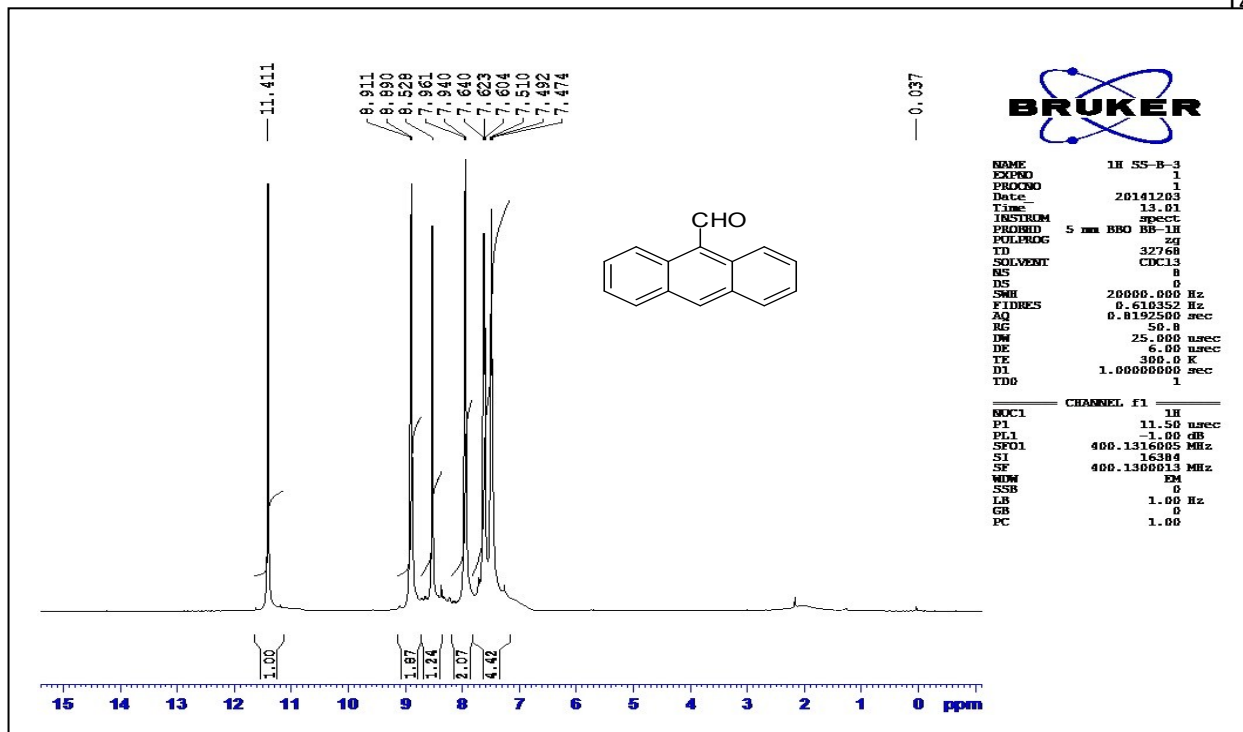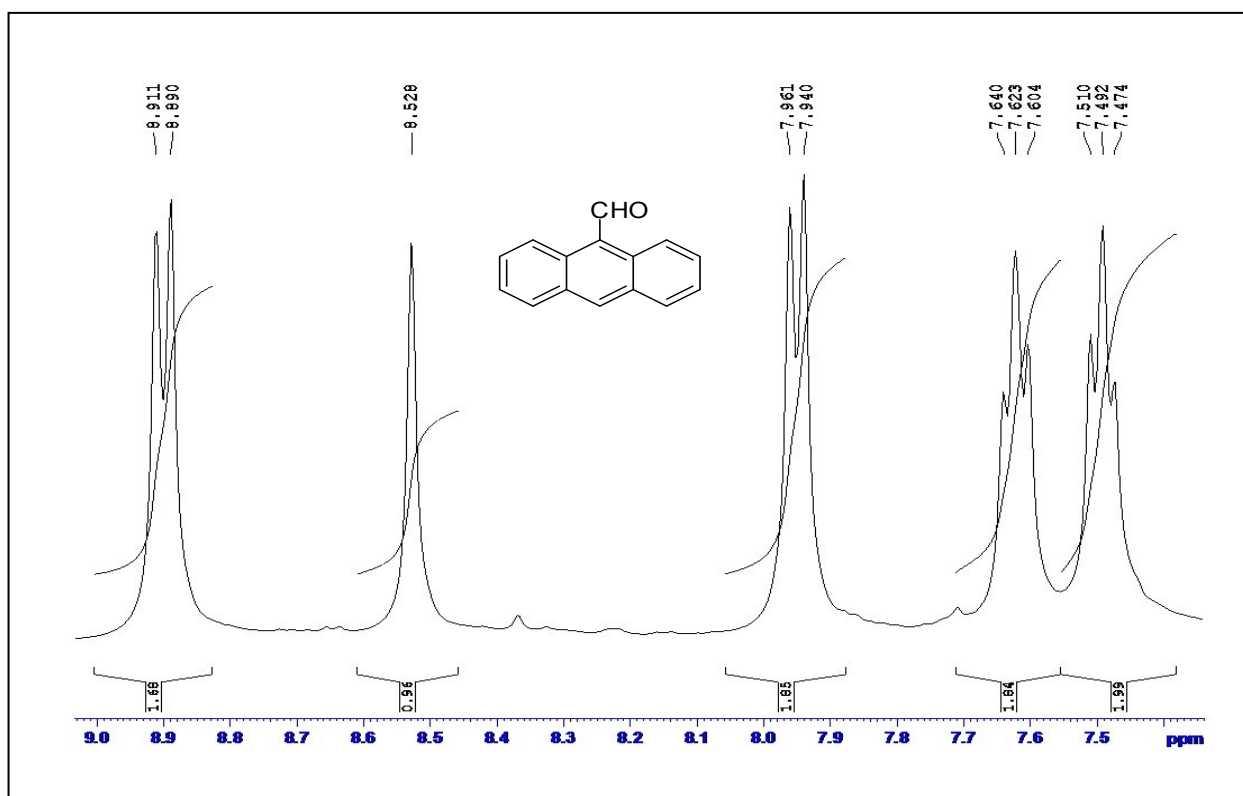

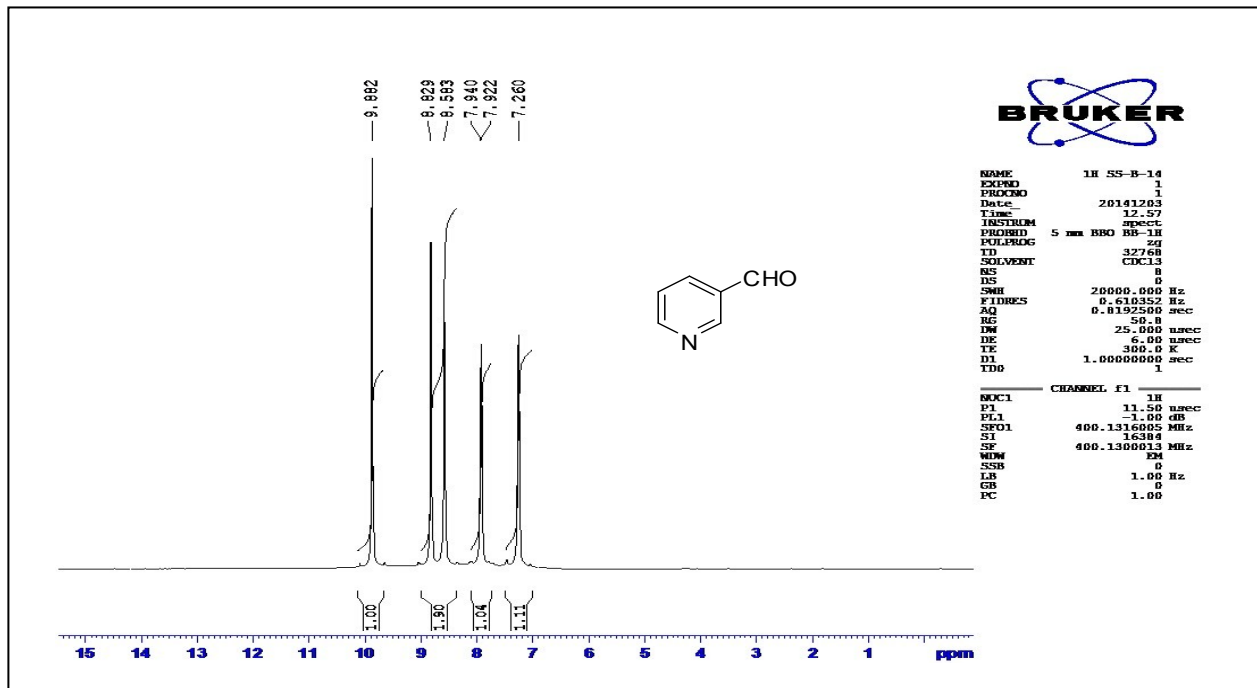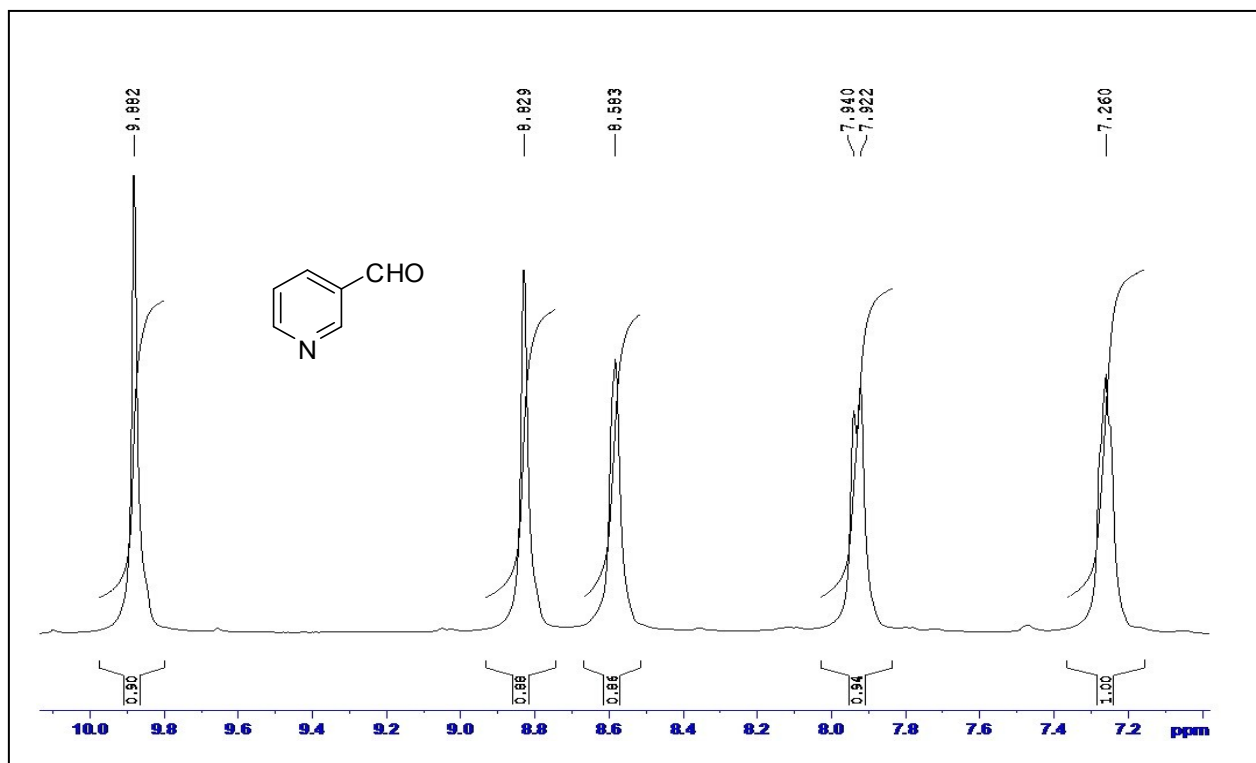

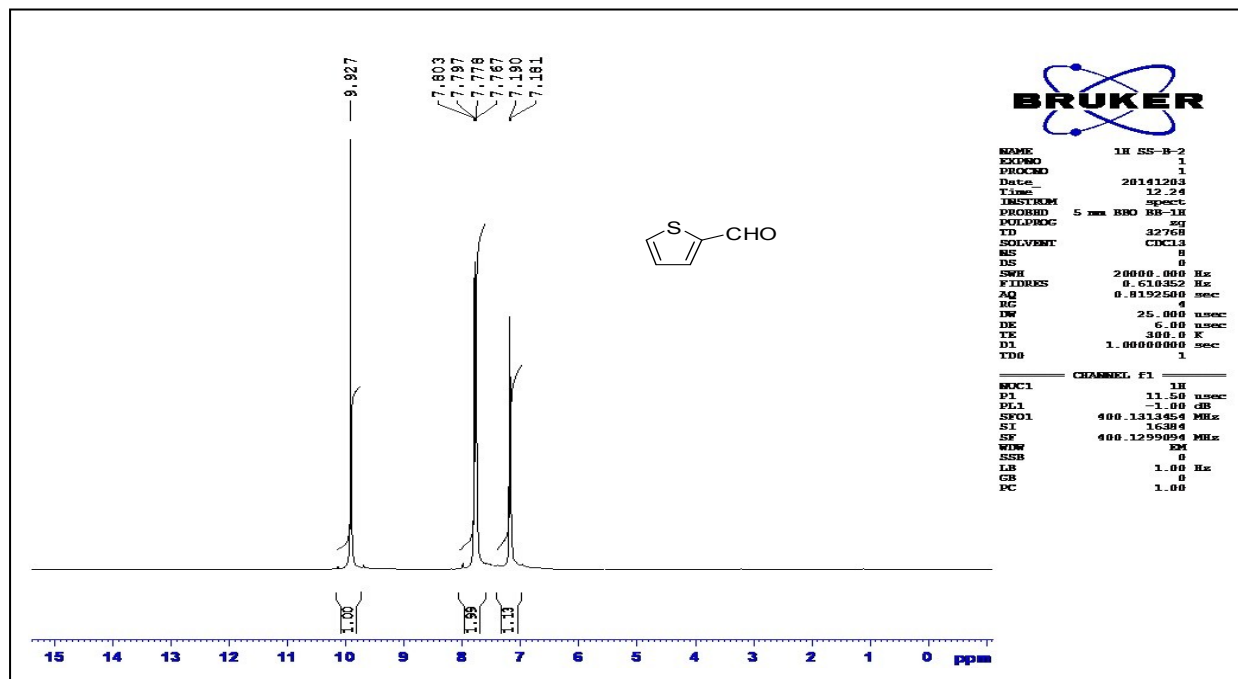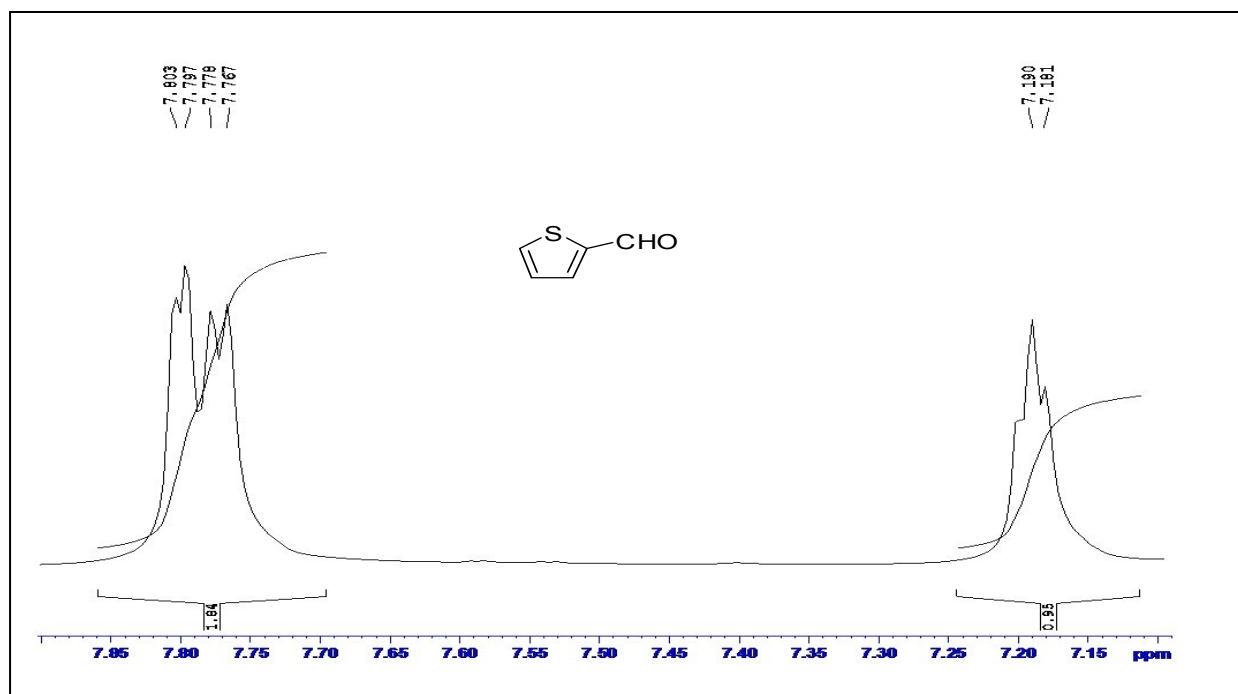



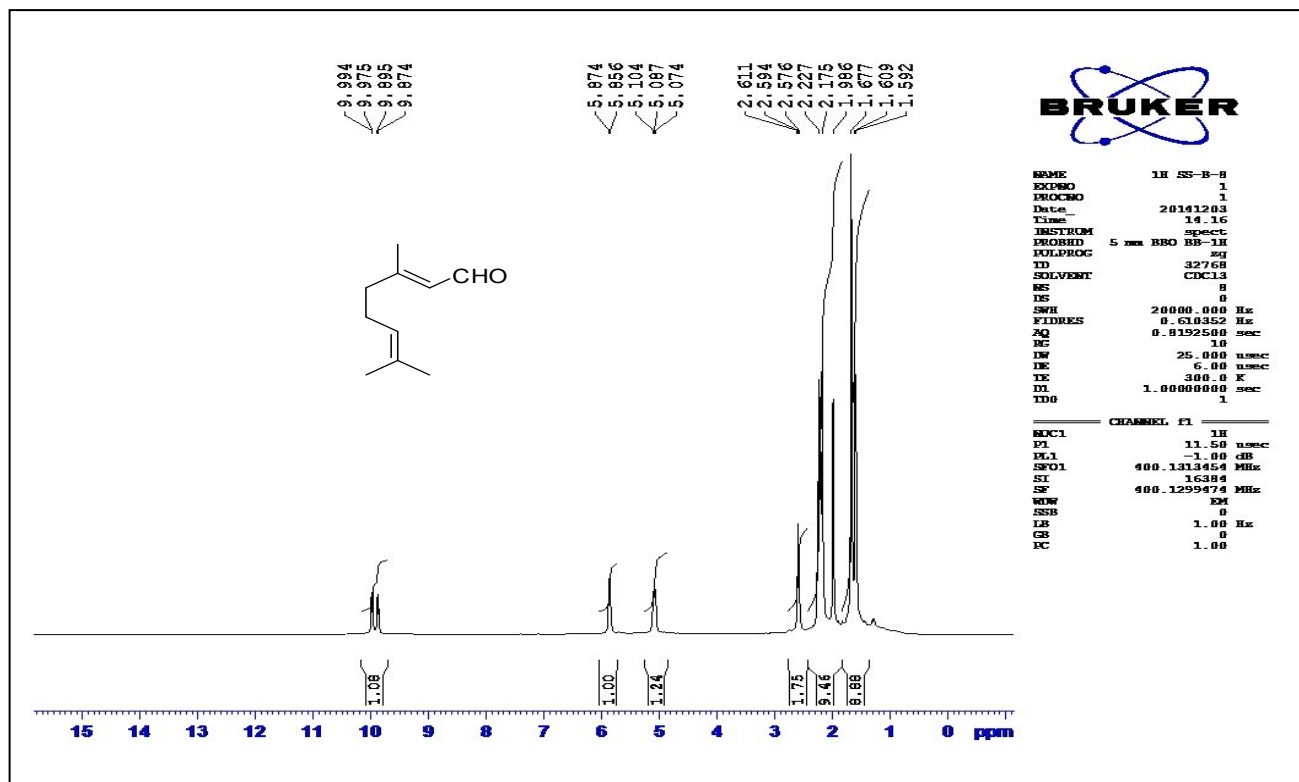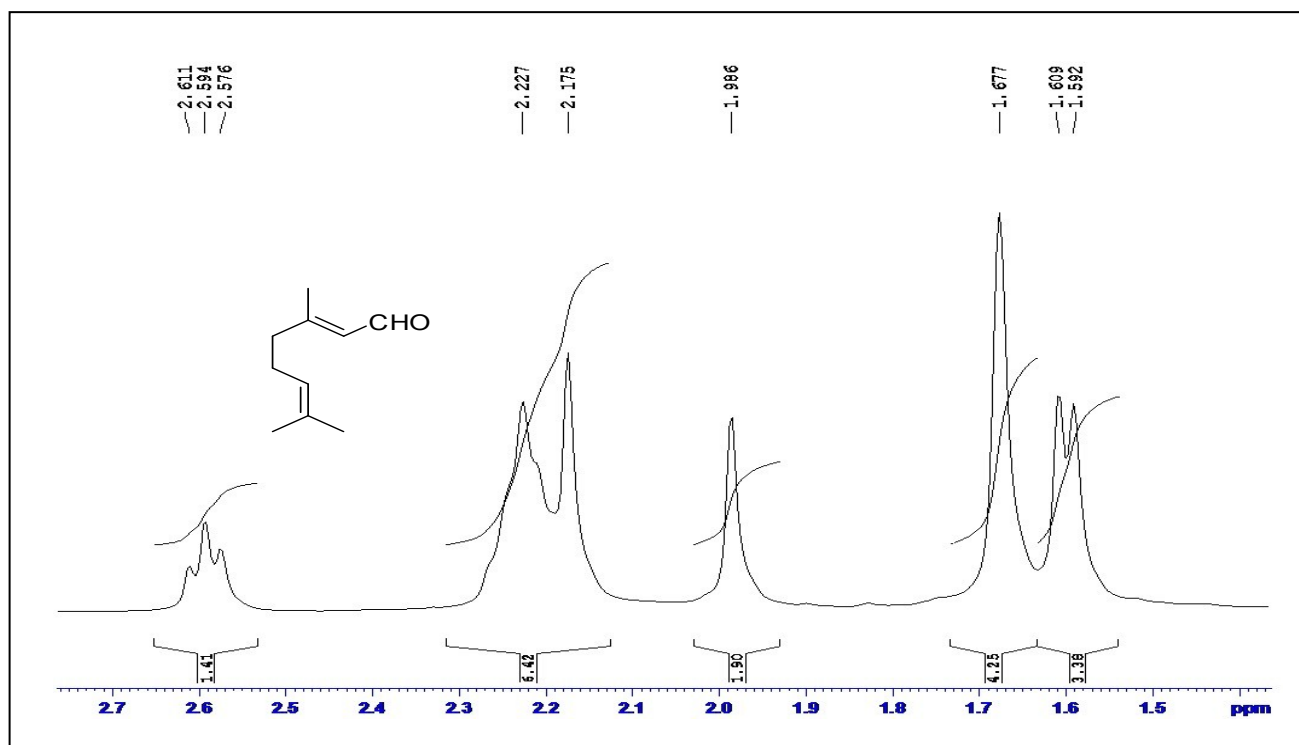

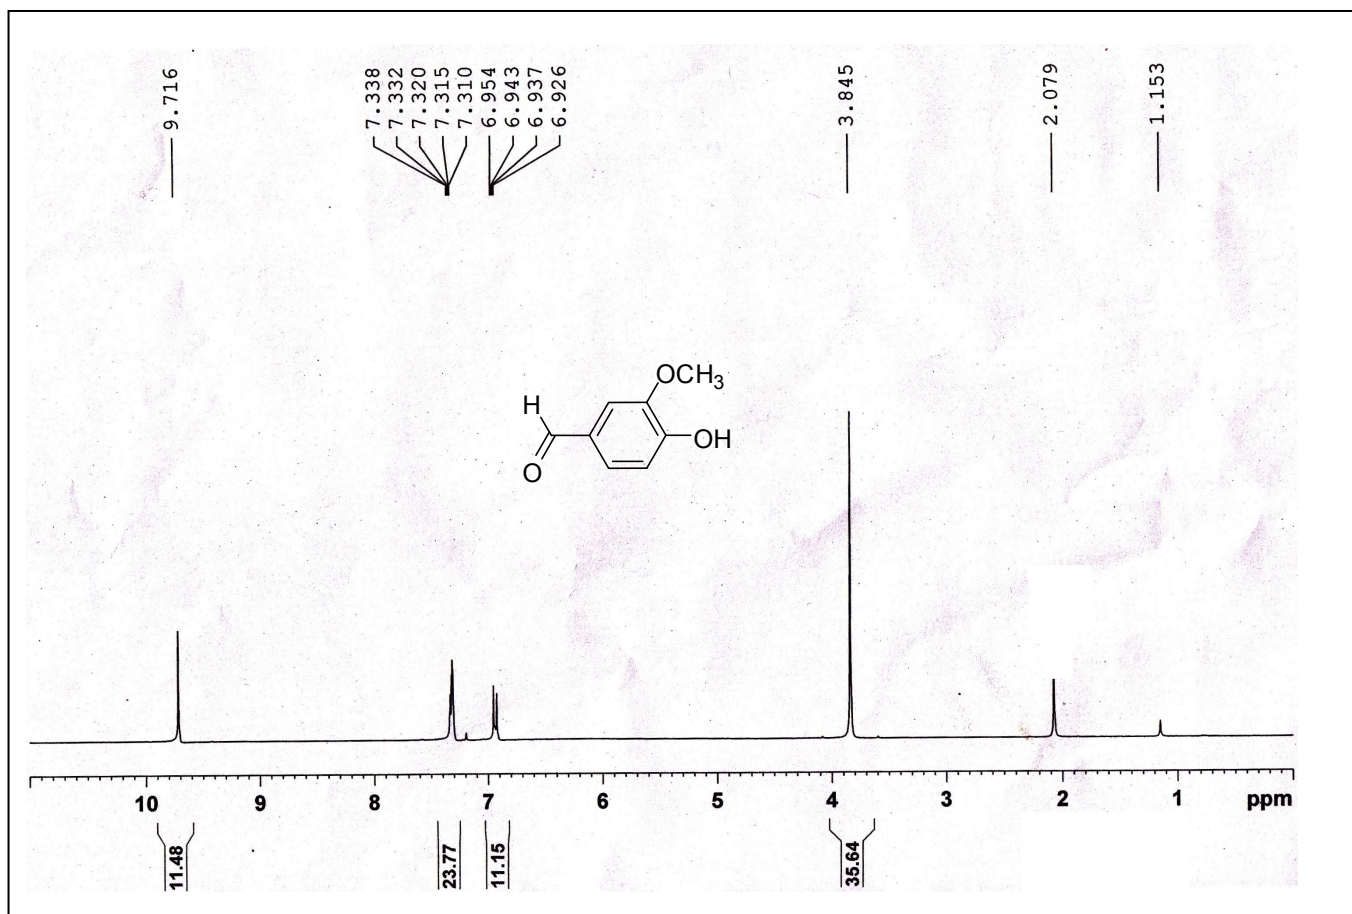

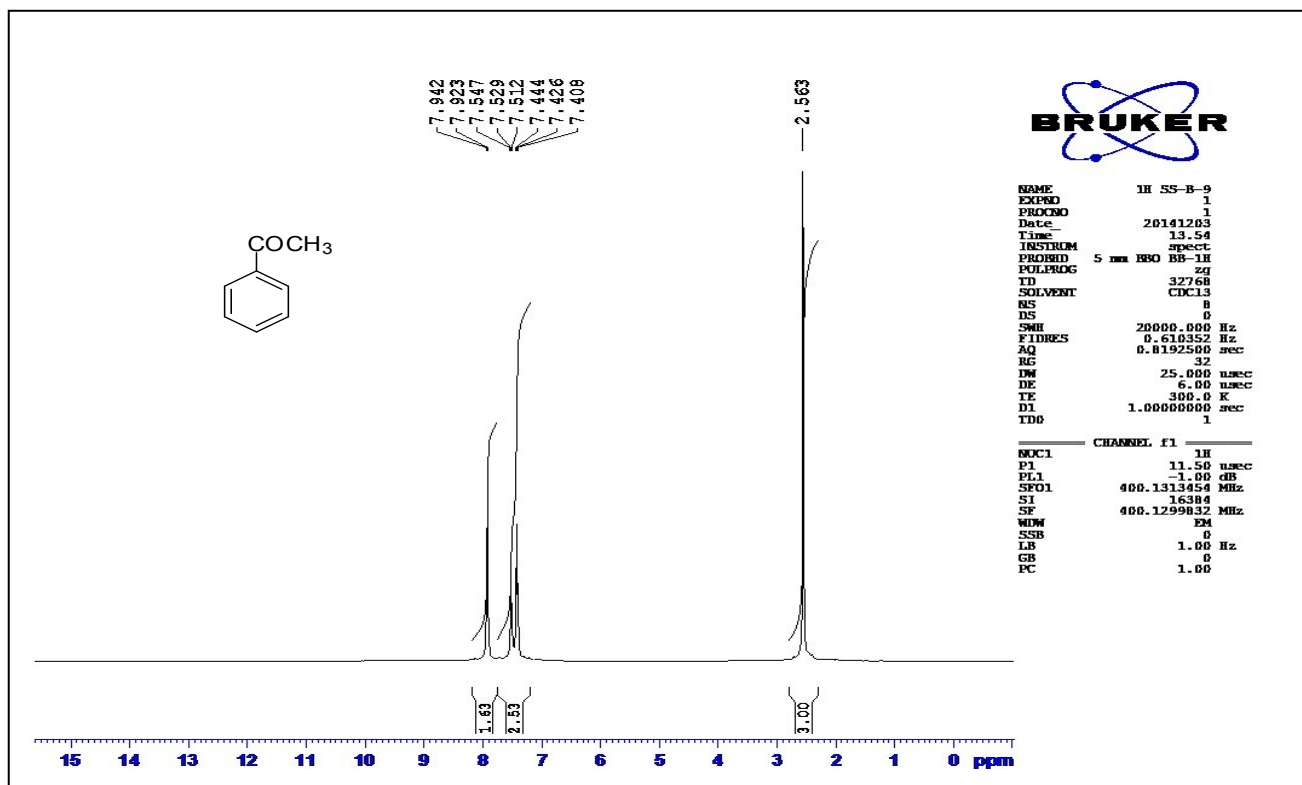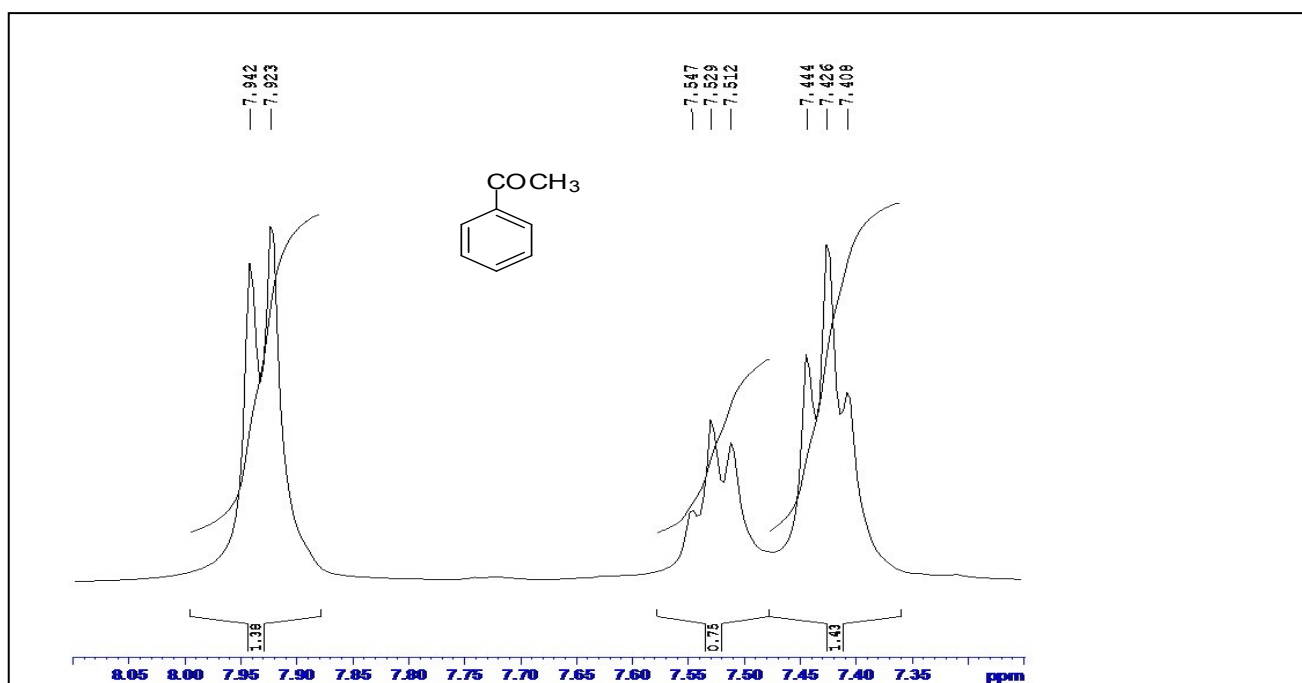

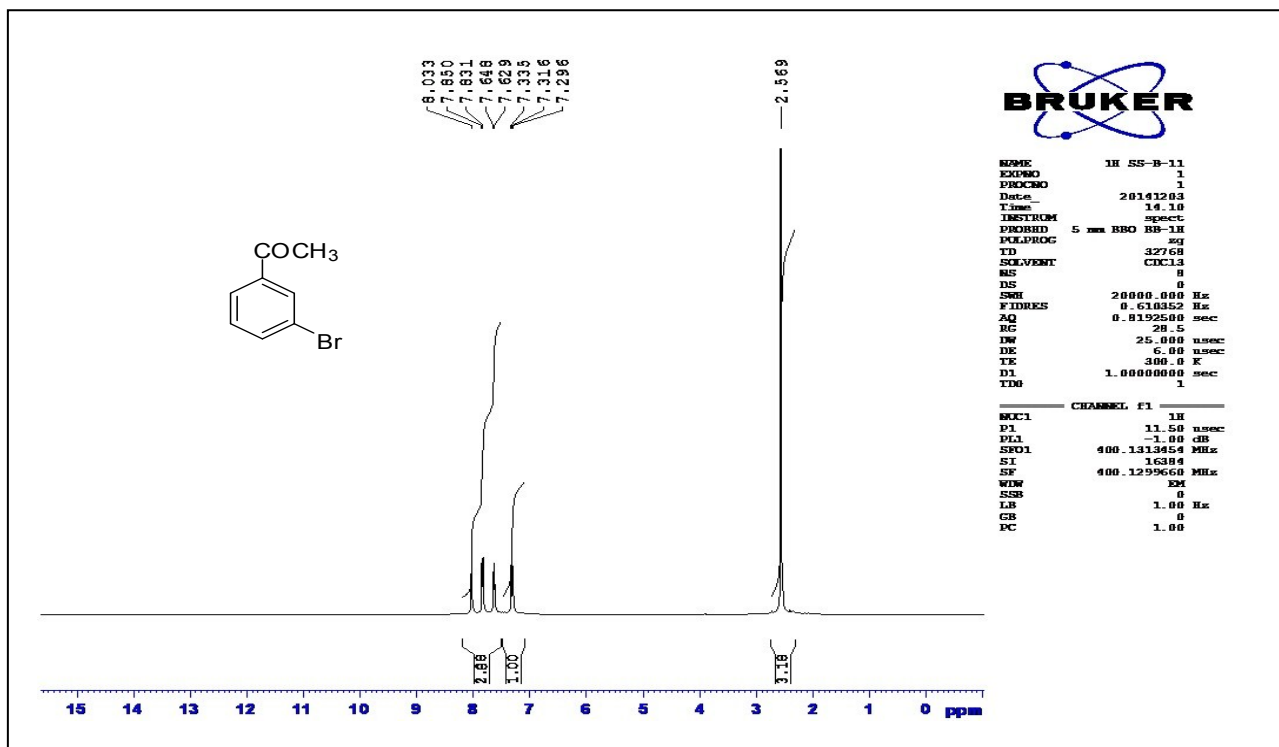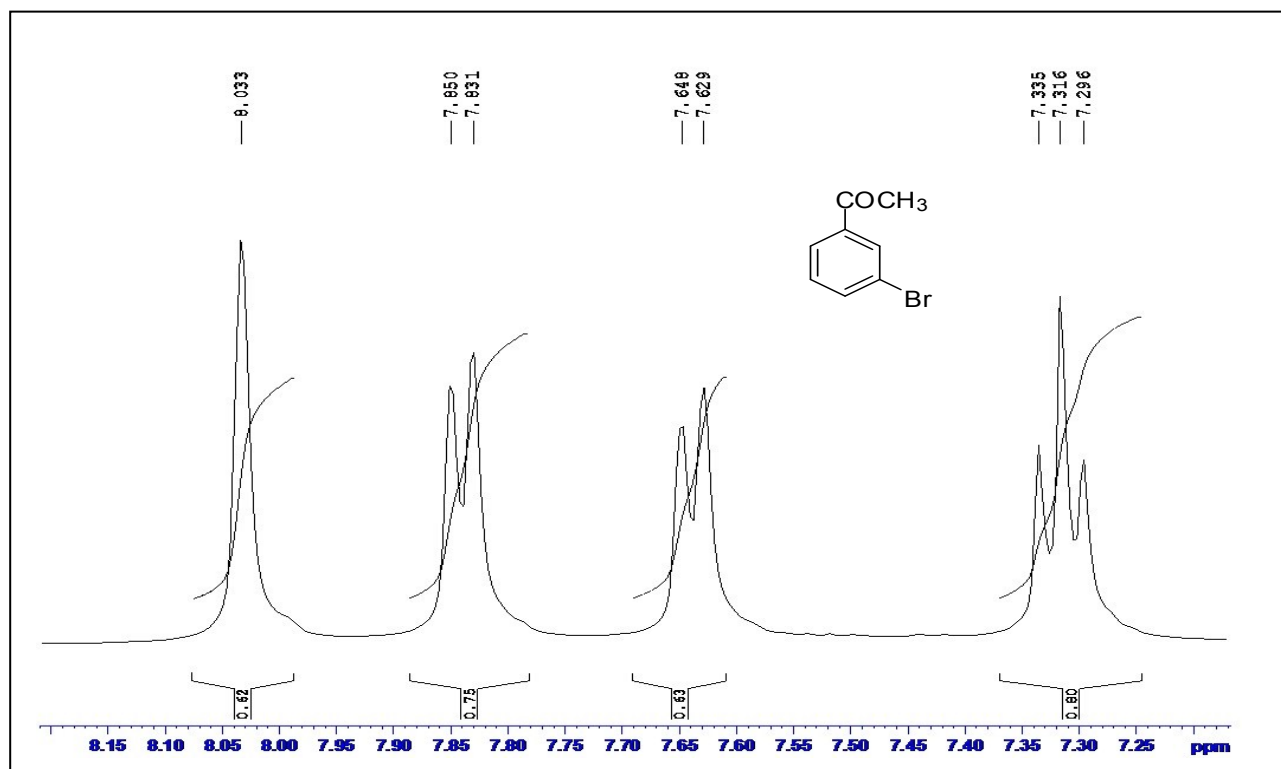

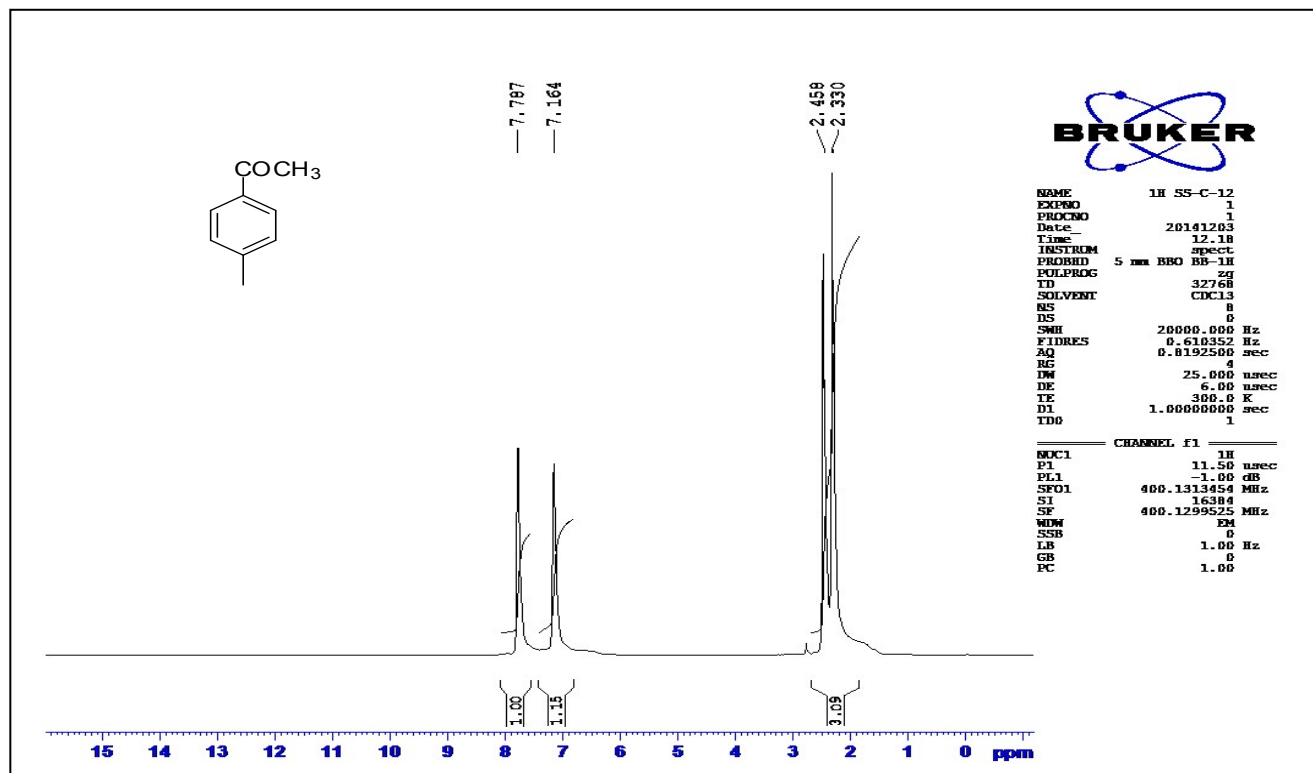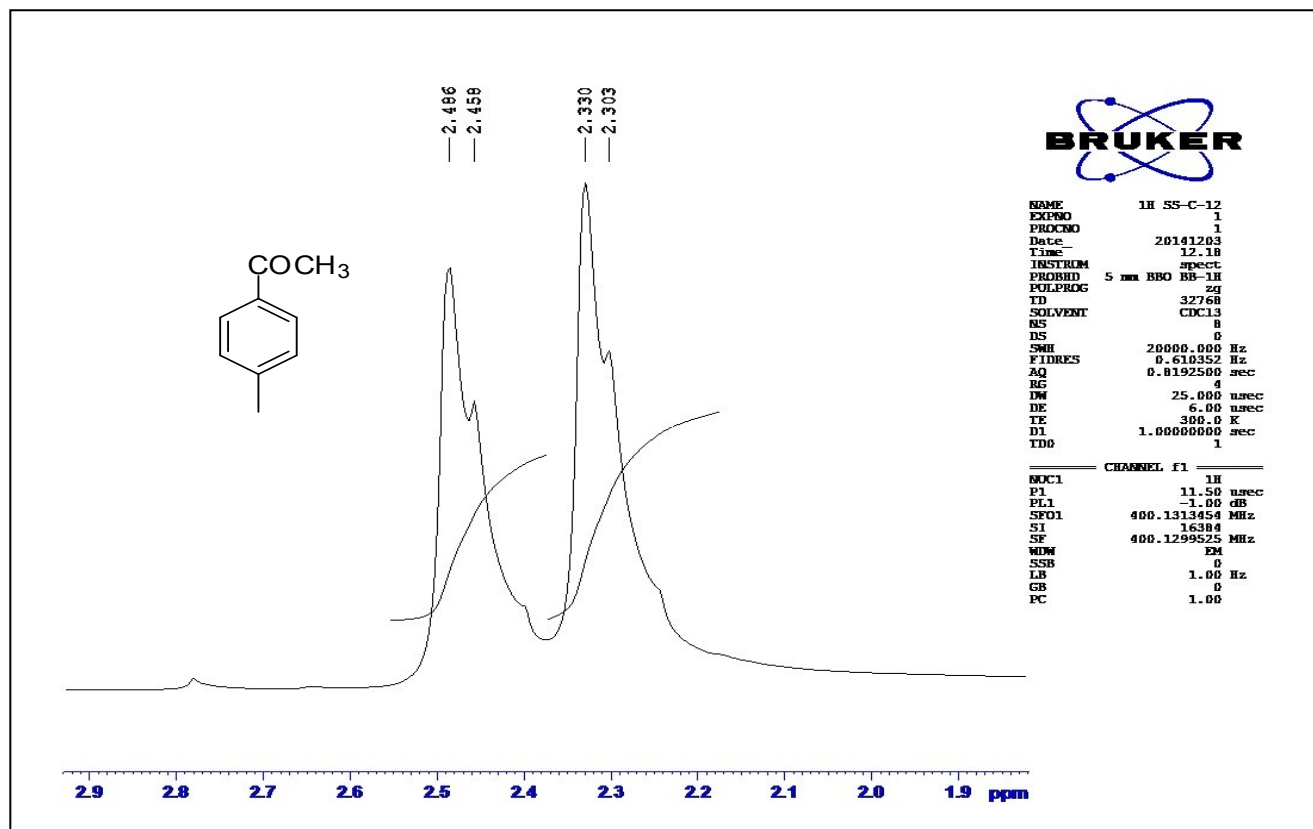

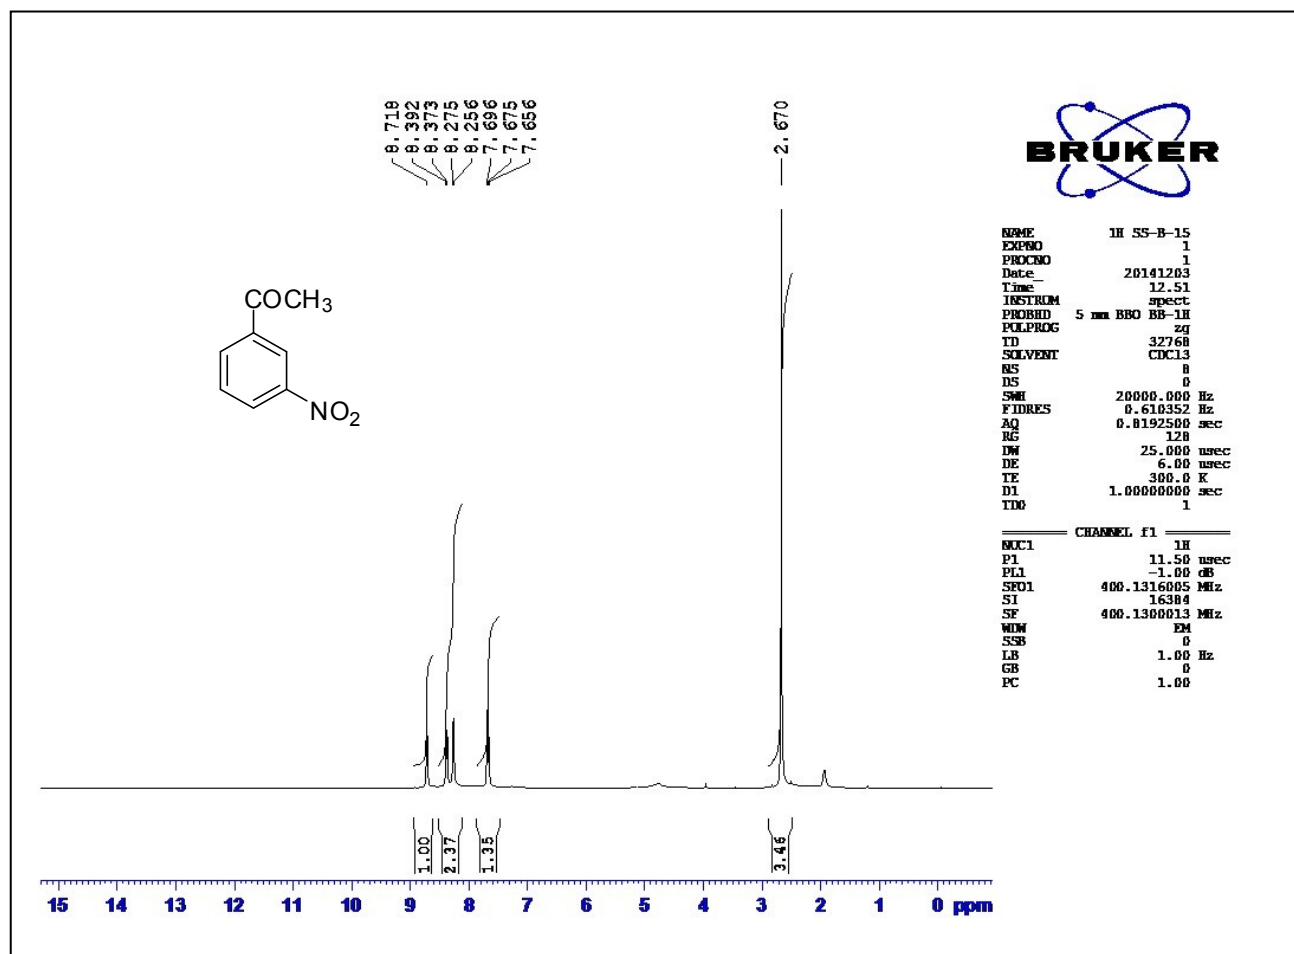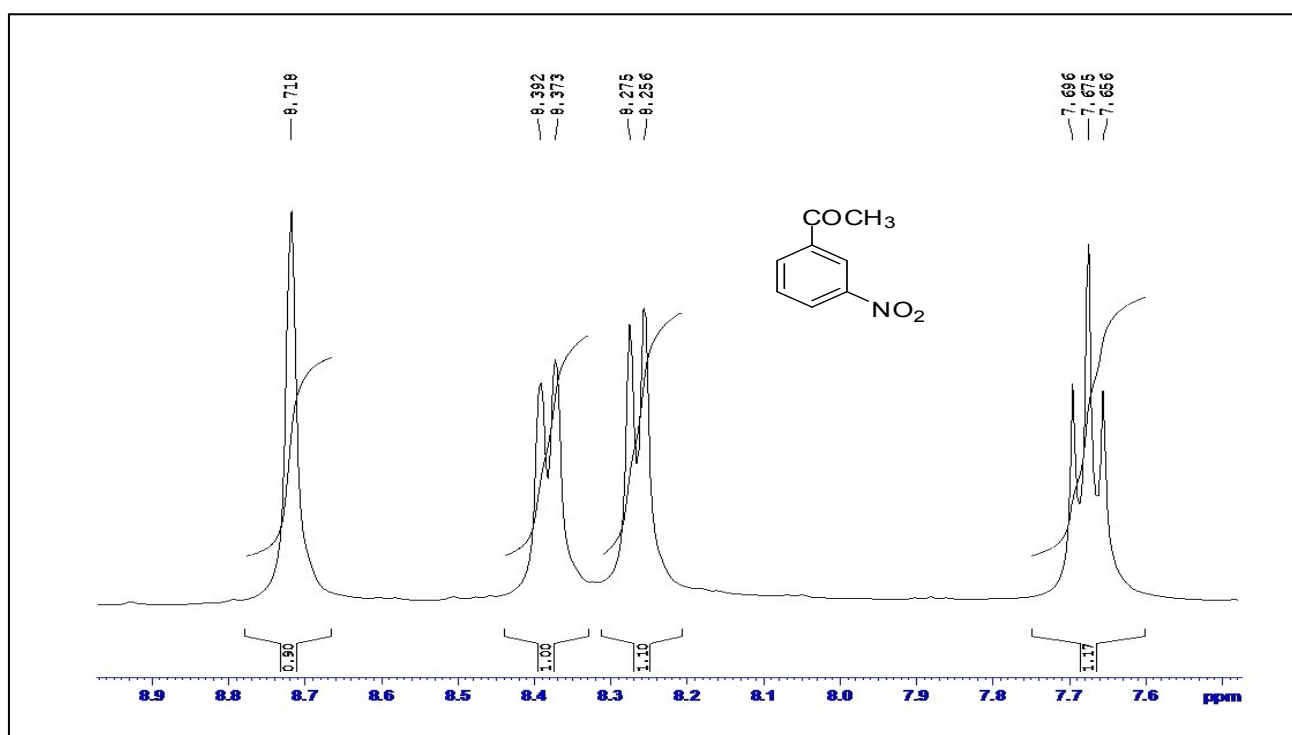

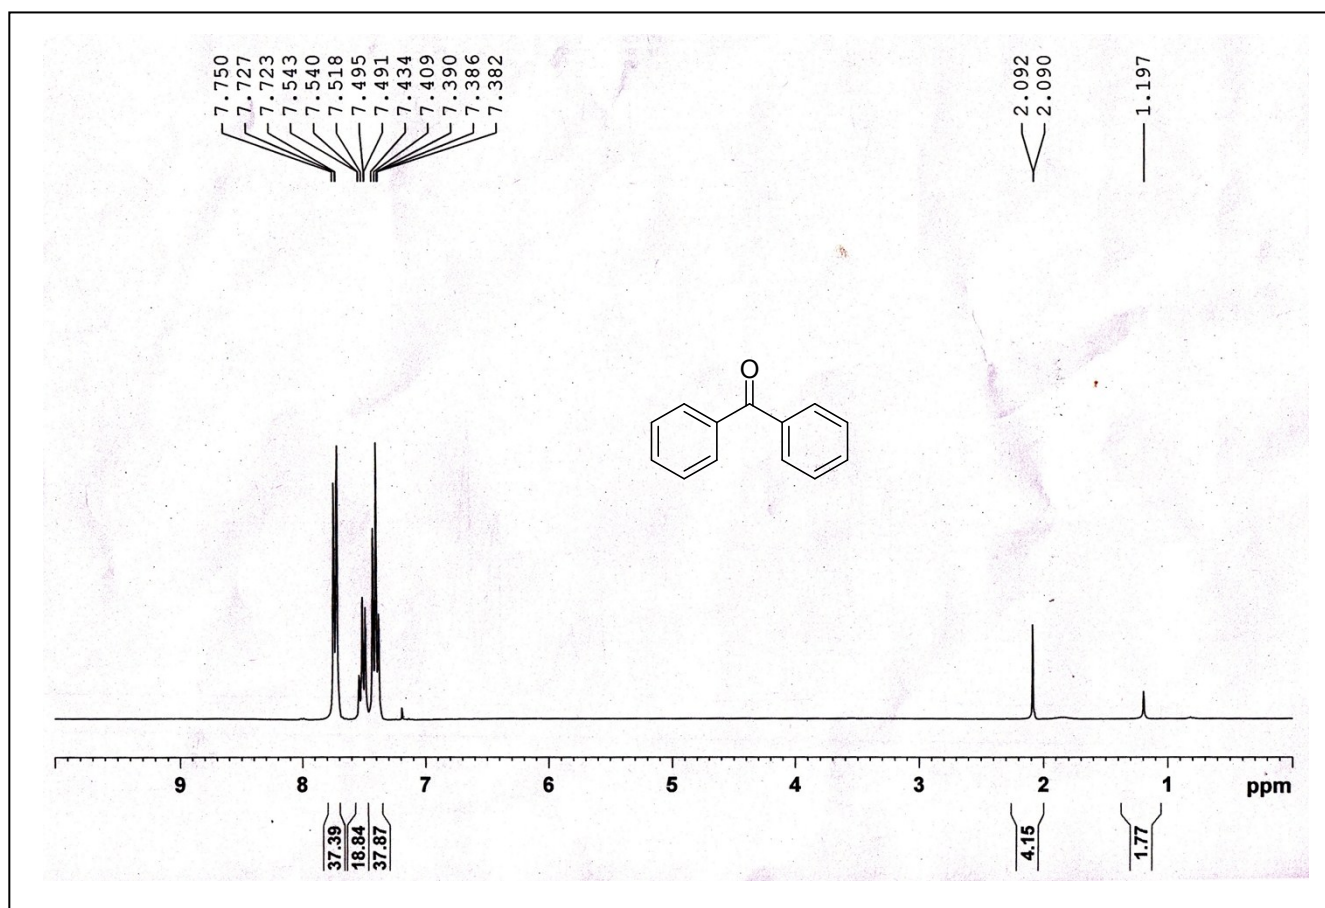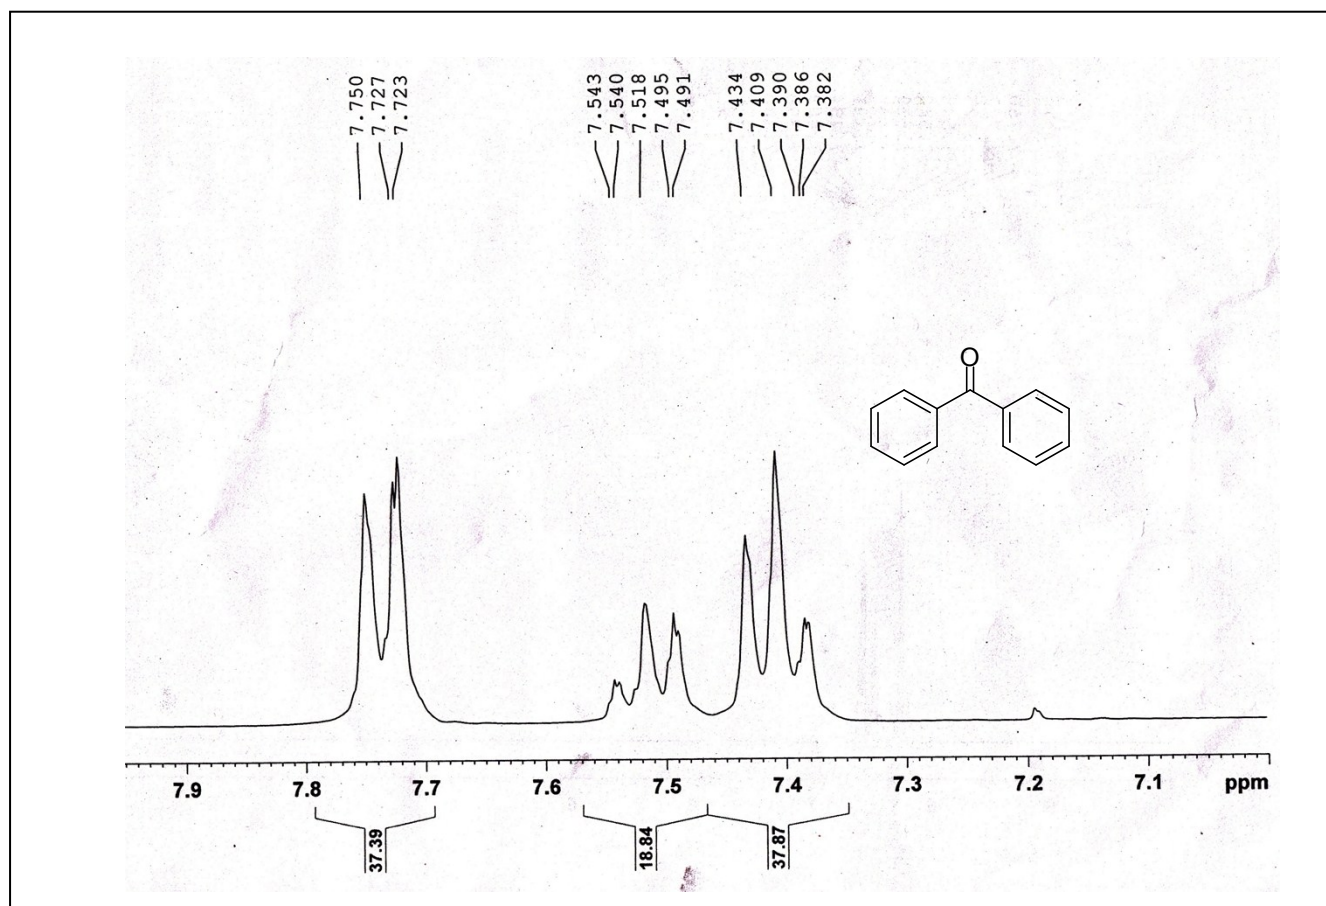

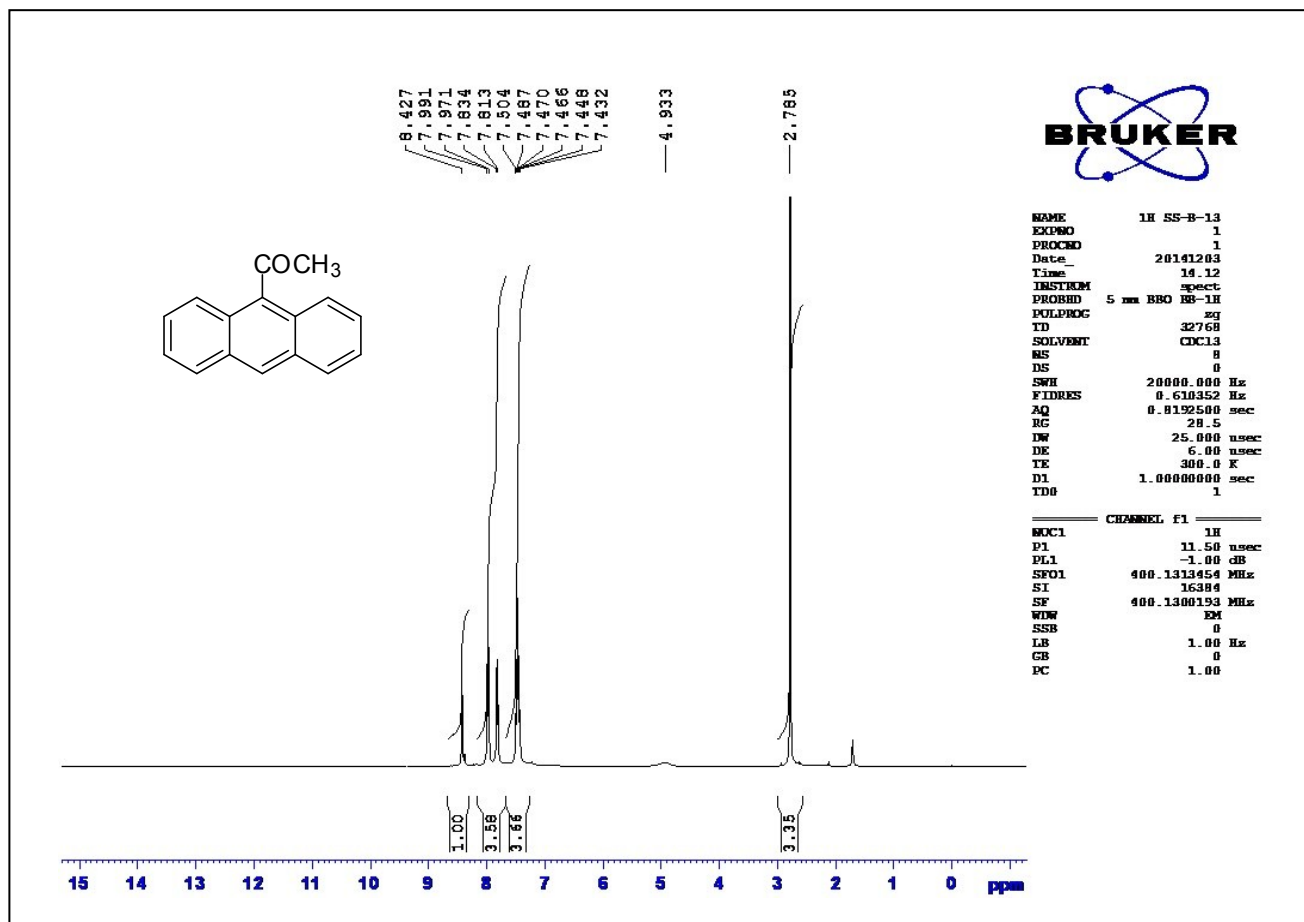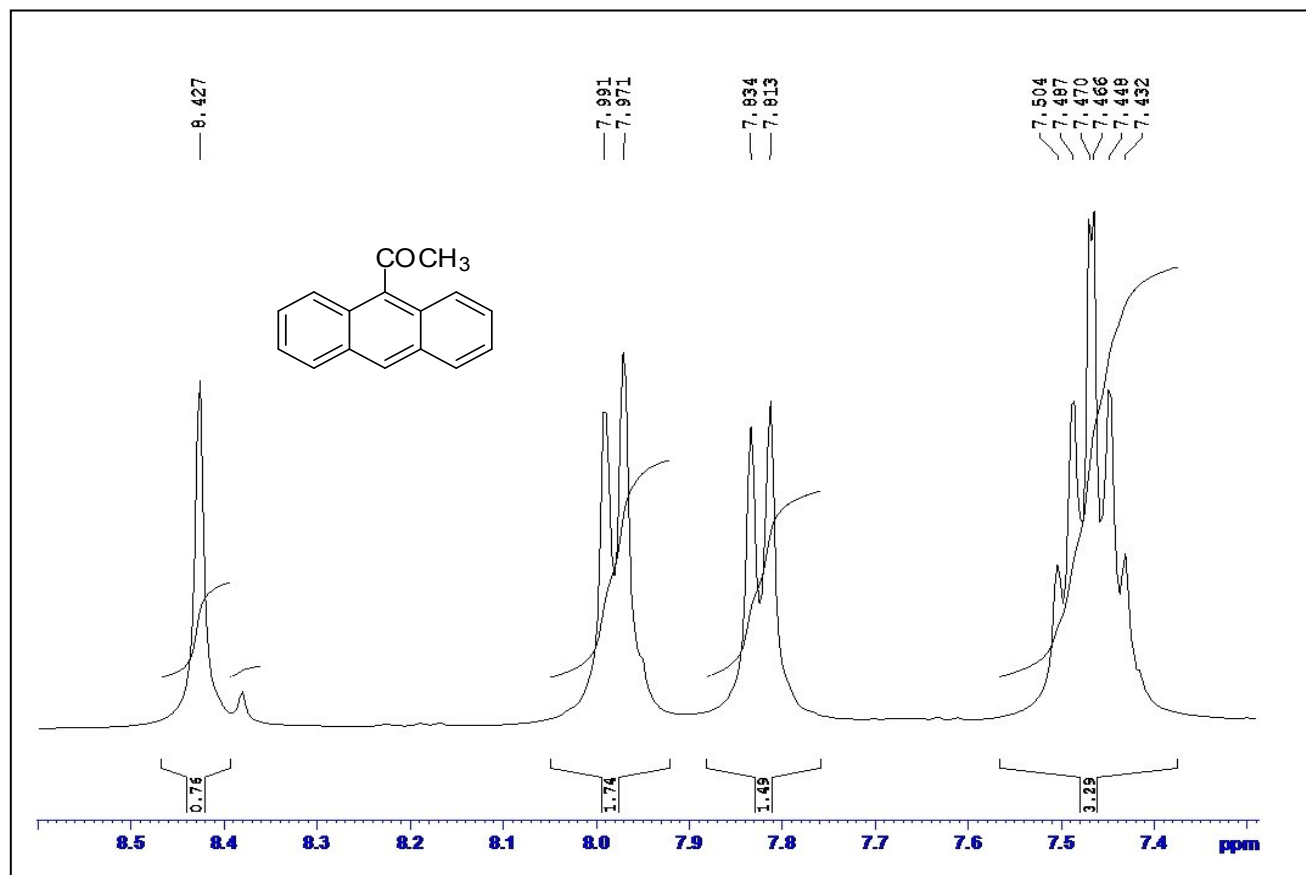



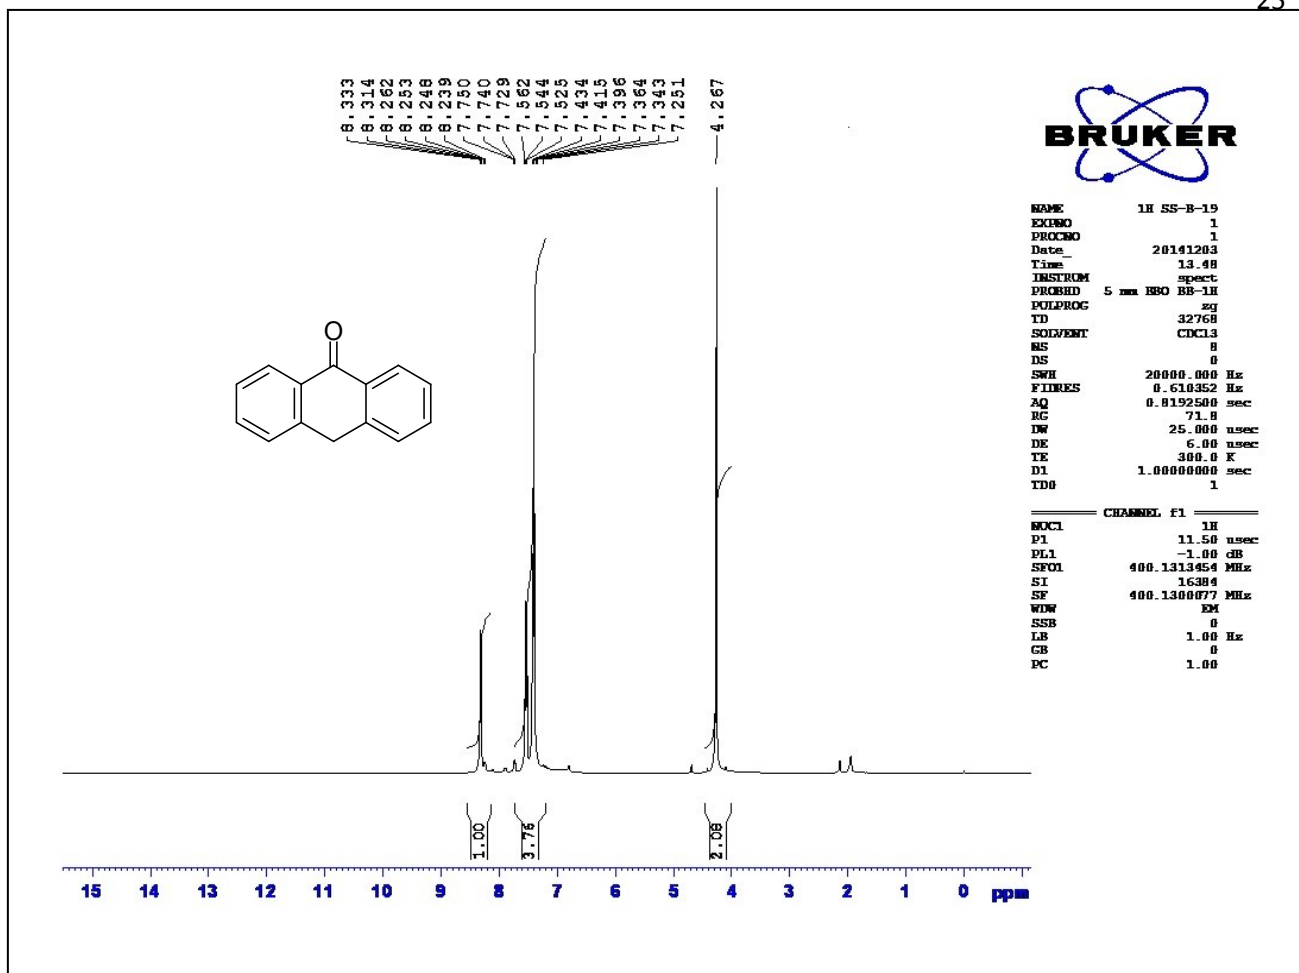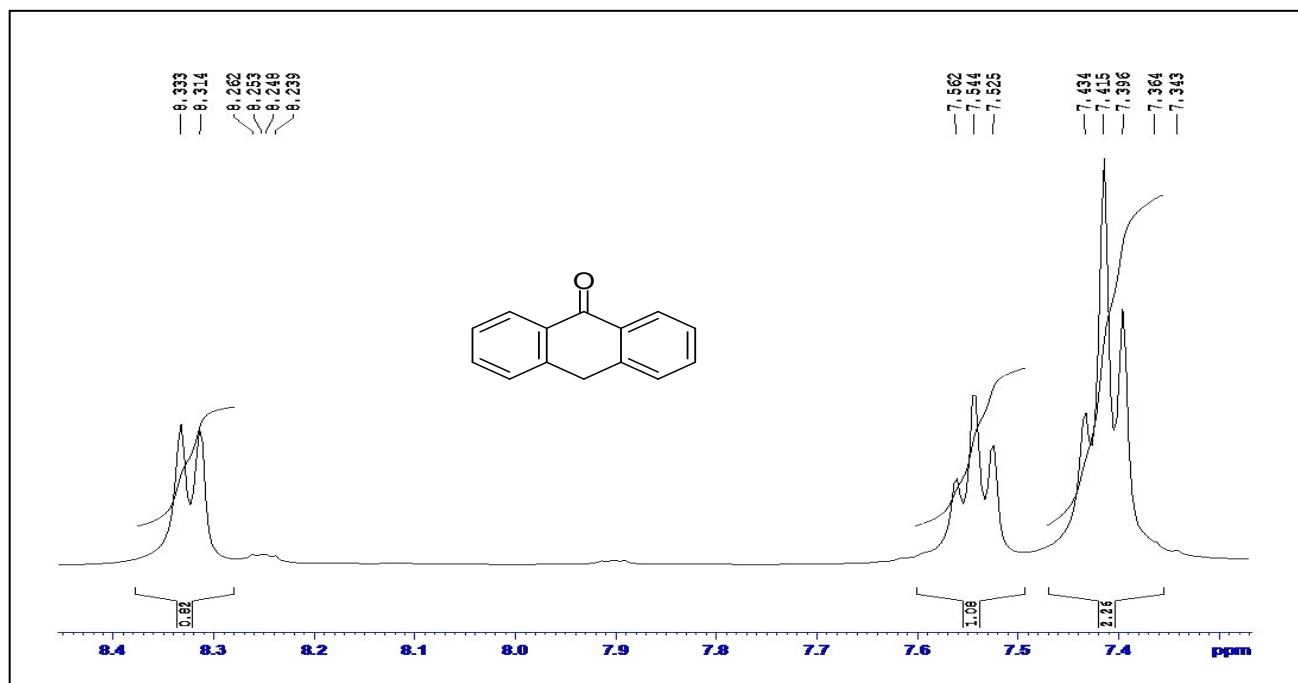

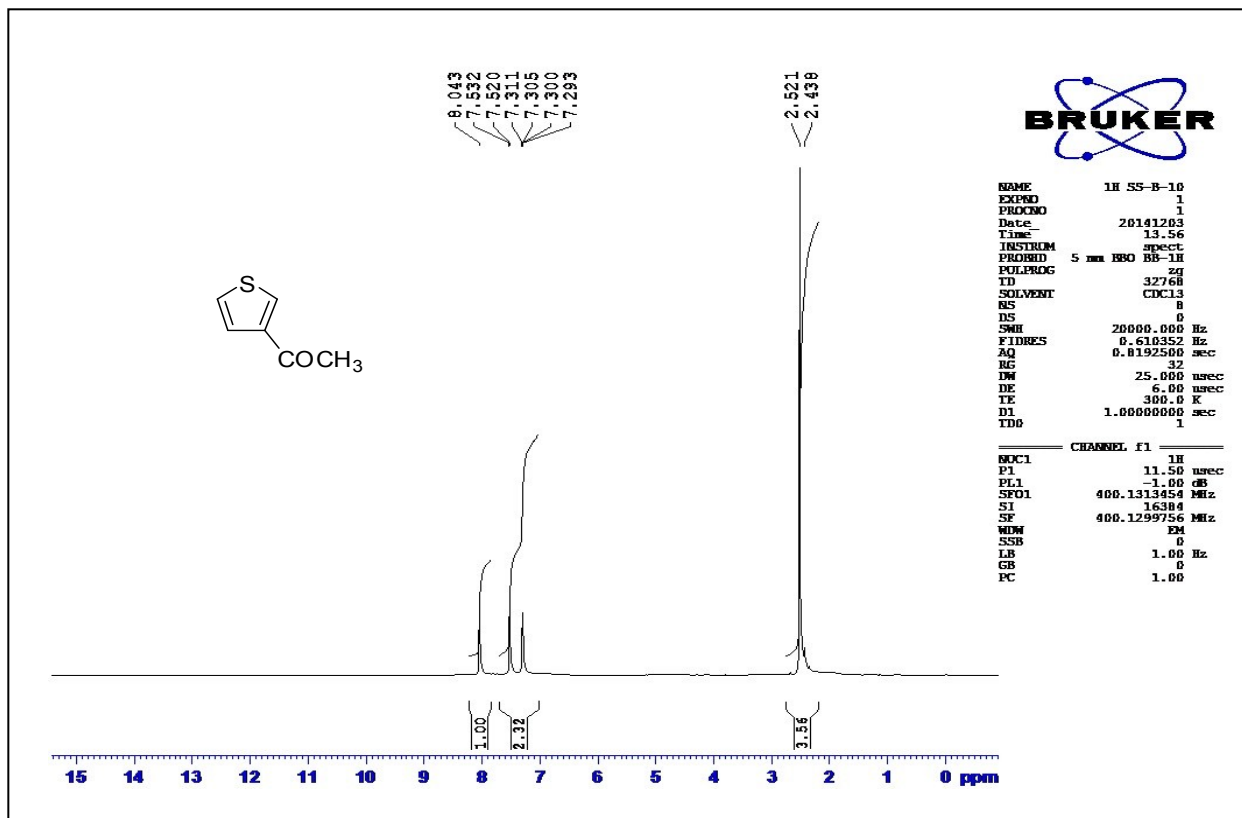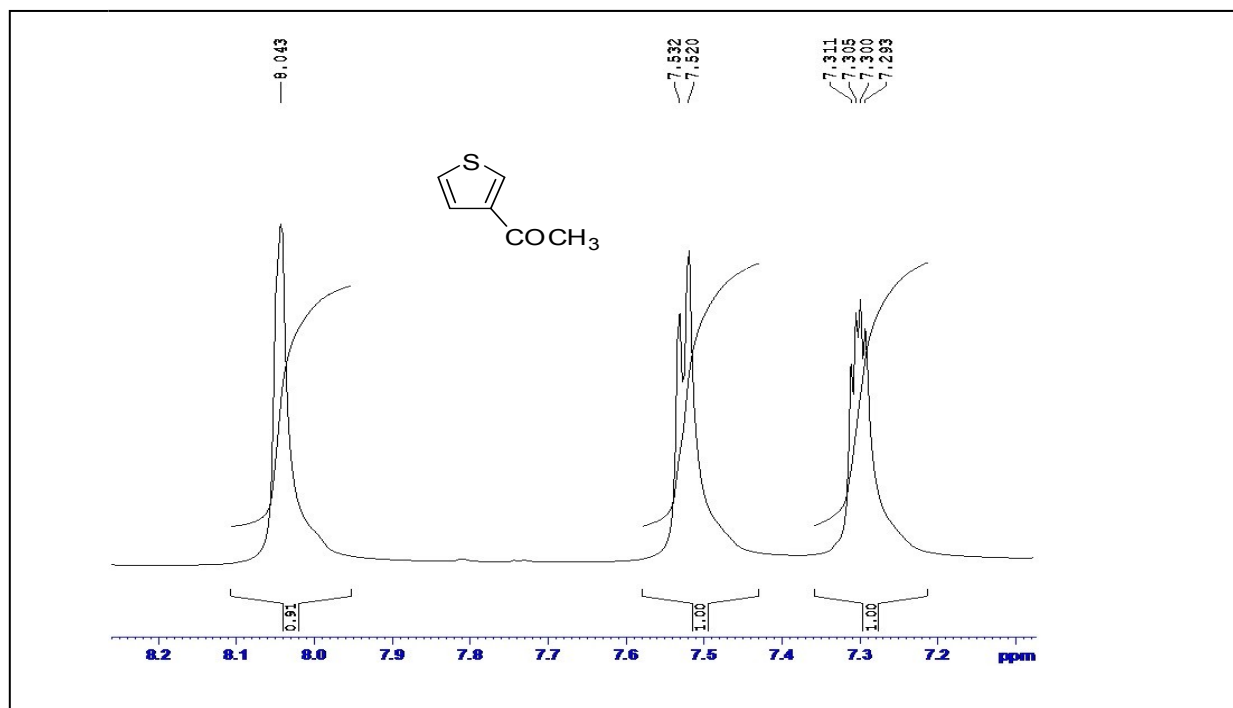

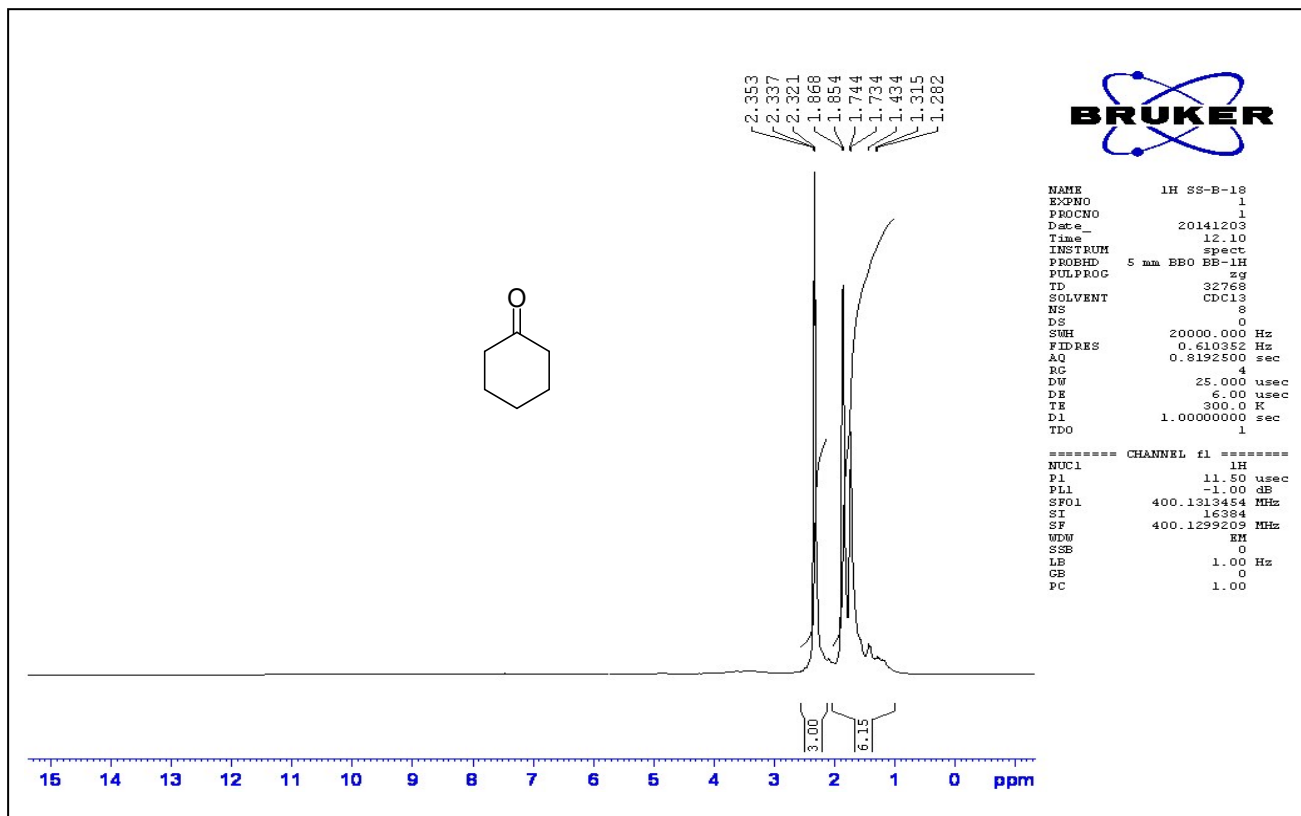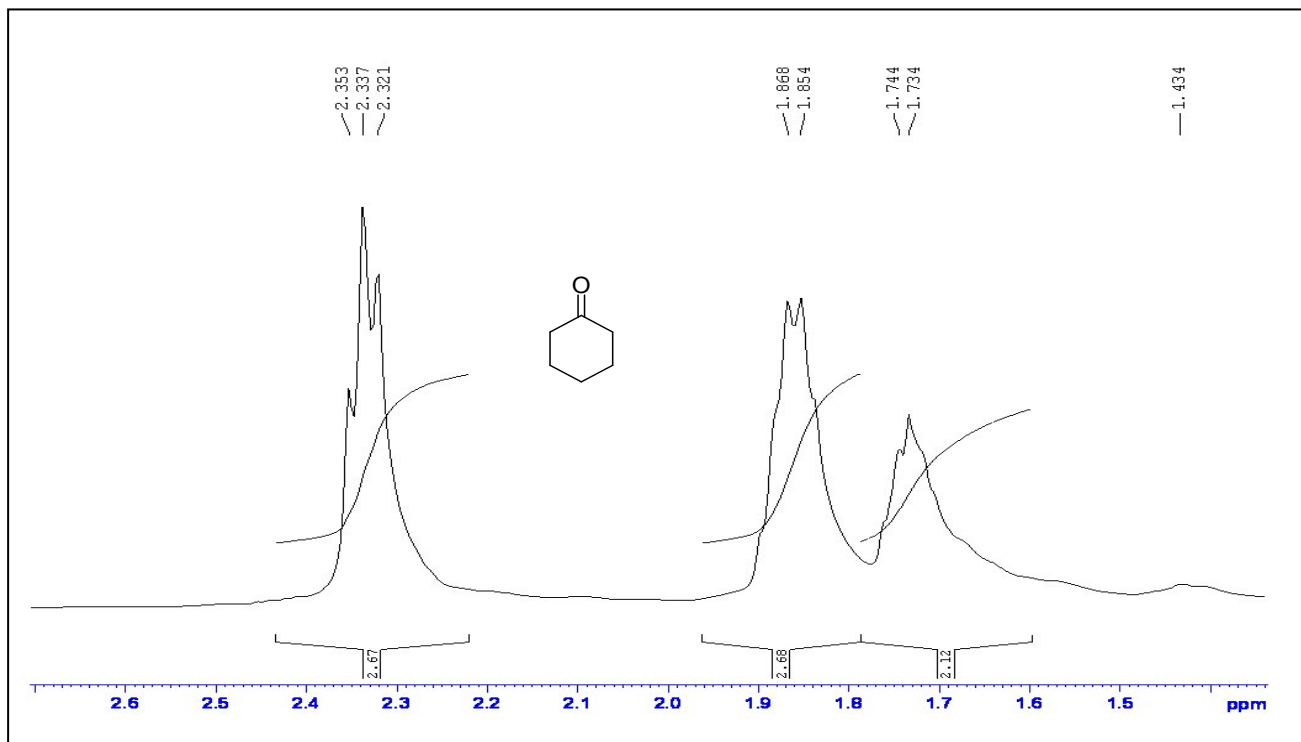

Supplement: c5ra18151h1.pdf [file c5ra18151h1.pdf]
